# 1 **Bi-directional protein-protein interactions control liquid-liquid phase** 2 **separation of PSD-95 and its interaction partners**

3  
4 Nikolaj Riis Christensen<sup>1,2</sup>, Christian Parsbæk Pedersen<sup>3</sup>, Vita Sereikaite<sup>1</sup>, Jannik  
5 Nedergaard Pedersen<sup>4</sup>, Maria Vistrup-Parry<sup>1</sup>, Andreas Toft Sørensen<sup>2</sup>, Daniel Otzen<sup>4</sup>, Lise  
6 Arleth<sup>5</sup>, Kaare Teilum<sup>3</sup>, Kenneth L. Madsen<sup>2,\*</sup> and Kristian Strømgaard<sup>1,\*</sup>

7  
8 <sup>1</sup>Center for Biopharmaceuticals, Department of Drug Design and Pharmacology,  
9 University of Copenhagen, Universitetsparken 2, DK-2100 Copenhagen, Denmark.

10 <sup>2</sup>Department of Neuroscience, University of Copenhagen, Blegdamsvej 3B, DK-2200  
11 Copenhagen, Denmark

12 <sup>3</sup>Structural Biology and NMR laboratory & the Linderstrøm-Lang Centre for Protein  
13 Science, Department of Biology, University of Copenhagen, Ole Maaløes Vej 5, DK-2200  
14 Copenhagen, Denmark

15 <sup>4</sup>Interdisciplinary Nanoscience Center (iNANO), Aarhus University, Gustav Wieds Vej  
16 14, DK-8000 Aarhus C, Denmark

17 <sup>5</sup>X-ray and Neutron Science, Niels Bohr Institute, University of Copenhagen,  
18 Blegdamsvej 17, DK-2100 Copenhagen, Denmark

19  
20  
21 \*Corresponding authors: [kennethma@sund.ku.dk](mailto:kennethma@sund.ku.dk) & [kristian.stromgaard@sund.ku.dk](mailto:kristian.stromgaard@sund.ku.dk)

24           **SUMMARY**

25           The organization of the postsynaptic density (PSD), a protein-dense semi-  
26 membraneless organelle, is mediated by numerous specific protein-protein interactions  
27 (PPIs) which constitute a functional post-synapse. Postsynaptic density protein 95 (PSD-  
28 95) interacts with a manifold of proteins, including the C-terminal of transmembrane AMPA  
29 receptor (AMAPR) regulatory proteins (TARPs). Here, we uncover the minimal essential  
30 peptide responsible for the stargazin (TARP- $\gamma$ 2) mediated liquid-liquid phase separation  
31 (LLPS) formation of PSD-95 and other key protein constituents of the PSD. Furthermore,  
32 we find that pharmacological inhibitors of PSD-95 can facilitate formation of LLPS. We  
33 found that in some cases LLPS formation is dependent on multivalent interactions while in  
34 other cases short peptides carrying a high charge are sufficient to promote LLPS in  
35 complex systems. This study offers a new perspective on PSD-95 interactions and their role  
36 in LLPS formation, while also considering the role of affinity over multivalency in LLPS  
37 systems.

38

39           **KEYWORDS:**

40           PSD-95, stargazin, liquid-liquid phase separation, multivalent complex formation,  
41 fuzzy complexes, postsynaptic density

42

## 43 INTRODUCTION:

44 Synaptic transmission is highly dependent on proper function and anchoring of ligand  
45 gated ion channels such as the  $\alpha$ -amino-3-hydroxy-5-methyl-4-isoxazolepropionic acid  
46 receptors (AMPA $\alpha$ s), which are responsible for the majority of fast excitatory transmission  
47 in the central nervous system (CNS). The postsynaptic density (PSD) contains ~2000  
48 proteins (Bayes et al., 2012; Bayes and Grant, 2009; Bayes et al., 2011; Distler et al., 2014;  
49 Grant, 2019; O'Rourke et al., 2012; Trinidad et al., 2008) and one of the most abundant  
50 proteins is postsynaptic density protein 95 (PSD-95, 724 residues [Human, Uniprot:  
51 P78352], molecular weight 80.5 kDa, with N-terminal palmitoylation 95 kDa) a master  
52 scaffold protein of the PSD. PSD-95 regulates the function of AMPARs indirectly through  
53 canonical and non-canonical PDZ-domain mediated interaction with several members of  
54 the TARP family, including Stargazin (Stg) also known as TARP- $\gamma$ 2, thereby anchoring the  
55 AMPAR/Stg receptor complex to the PSD membrane and further into the post synapse  
56 (Bissen et al., 2019; Zeng et al., 2019).

57 PSD-95 typically interacts with the C-terminus of a target protein through one of its  
58 three PDZ domains, and as is the case for most synaptic PDZ dependent interactions, the  
59 affinities are generally in the  $\mu$ M range (Christensen et al., 2019; Stiffler et al., 2007; Stiffler  
60 et al., 2006; Ye et al., 2018; Zhang et al., 2013). Nevertheless, several examples have  
61 emerged where PDZ binding is coupled to secondary binding sites, including the lipid  
62 membrane, which dramatically potentiates the affinity of the overall interaction (Erlendsson  
63 et al., 2019; Janezic et al., 2019; Zeng et al., 2019; Zeng et al., 2016a; Zeng et al., 2016b).  
64 Due to its role as a master scaffold protein in synaptic transmission, PSD-95 has been  
65 suggested as a promising drug target for treatment of ischemic stroke and chronic pain  
66 amongst others. Currently, there are several lead candidates targeting PSD-95 in both pre-  
67 clinical and clinical development (Christensen et al., 2019), covering both small molecules

68 (Florio et al., 2009; Hu et al., 2013; Lee et al., 2015; Wu et al., 2014) and in particular  
69 peptide derived compounds (Bach et al., 2009; Bach et al., 2012; Bach et al., 2011; Long et  
70 al., 2003; Nissen et al., 2015; Piserchio et al., 2004; Sainlos et al., 2011; Aarts et al., 2002),  
71 all of which target the PDZ domains of PSD-95. These molecules feature both monovalent  
72 and multivalent interactions with PSD-95, and their affinities range from  $\mu\text{M}$  (Florio et al.,  
73 2009; Piserchio et al., 2004; Aarts et al., 2002) to low nM (Bach et al., 2009; Bach et al.,  
74 2012; Nissen et al., 2015).

75       Recently, liquid-liquid phase separation (LLPS) and the formation of membraneless  
76 organelles have emerged as a common feature of protein assembly in many branches of  
77 cellular biology (Alberti et al., 2019; Banani et al., 2017). It was recently shown that PSD-95  
78 can undergo LLPS in different ways, both in complex with synaptic Ras GTPase-activating  
79 protein (SynGAP) and in complex with four additional proteins, namely homer protein  
80 homolog 3 (Homer3), SH3, multiple ankyrin repeat domains 3 (Shank3) and guanylate  
81 kinase-associated protein (GKAP). In addition, PSD-95 also undertake LLPS in complex  
82 with the Stg C-terminus and the C-termini of other members of the TARP family as well as  
83 the C-terminal of N-methyl-D-aspartate receptors (NMDAR) (Tao et al., 2019; Zeng et al.,  
84 2018; Zeng et al., 2019; Zeng et al., 2016a). The LLPS of the key PSD components  
85 suggest that the formation of a postsynaptic condensate can govern key aspects of  
86 synaptic transmission (Zeng et al., 2019).

87       In this study we investigated the behavior of PSD-95 in solution and in complex with  
88 multivalent ligands derived from the Stargazin C-terminal region. We show how PSD-95  
89 behaves as a monomer in solution and that PSD-95 can undergo LLPS in absence and  
90 presence of ligands and key components of the PSD. We then show how PSD-95 can act  
91 as a bi-directional modulator of LLPS formation and confirm a secondary charge dense  
92 binding site in Stargazin for PSD-95. Finally, we tested the ability of known, charge-dense,

93 pharmacologically relevant inhibitors of PSD-95 to induce LLPS. Taken together our  
94 findings suggest novel mechanisms for ligand-induced PSD-95 LLPS formation, defined by  
95 highly charged peptides and/or multivalent interactions.

96

## 97 **RESULTS**

### 98 **PSD-95 organizes as a monomer with compact tertiary structure in solution**

99 Structural studies of PSD-95 have previously shown that PSD-95 can organize as  
100 either an elongated protein arranged perpendicular to the synaptic membrane (Chen et al.,  
101 2011) or in a more compact fashion in negative stain EM (Fomina et al., 2011). High-  
102 resolution structures of all the individual structured domains of PSD-95 have been obtained  
103 (Bach et al., 2012; Long et al., 2003; McGee et al., 2001; Rodzli et al., 2020; Sainlos et al.,  
104 2011; Tavares et al., 2001; Zeng et al., 2016b; Zhu et al., 2017), while the complex  
105 interplay and dynamics in solution between the structured domains and flexible linkers  
106 remain to be explored (Figure 1A). To bridge this structural information, we investigated the  
107 solution structure of full-length PSD-95 using small angle X-ray scattering (SAXS).

108 We found that full length PSD-95 is stable in solution, with a mean radius of gyration  
109 ( $R_g$ ) =  $59 \text{ \AA} \pm 4 \text{ \AA}$  and a maximal distance ( $D_{max}$ ) =  $245 \text{ \AA} \pm 23 \text{ \AA}$ , and a  $M_{w,calc} = 88 \text{ kDa} \pm 8$   
110 kDa which corresponds well with a monomer of PSD-95 ( $M_{Wteo} = 80.8 \text{ kDa}$ ), across the 30-  
111 210  $\mu\text{M}$  concentration span (Figure 1B insert, and Figure S1A). A Kratky plot (Kikhney and  
112 Svergun, 2015) of the scattering data (Figure S1B) suggested that PSD-95 is a flexible  
113 protein, as would be expected, since PSD-95 comprises a series of protein domains  
114 connected by flexible linkers and a disordered N-terminus (Figure 1A-B and Figure S1B).  
115 Hence, we used an ensemble optimization method (EOM) (Bernado et al., 2007; Tria et al.,  
116 2015) to fit an ensemble of PSD-95 conformations (Figure 1D-E). This provides a better  
117 representation of the flexible structures than a single state model. To obtain a solution

118 structure of full-length PSD-95, we generated a series of models using known structural  
119 domains of PSD-95 (PDZ1-2, PDB: 3GSL; PDZ3, PDB: 5JXB; SH3-GK, PDB: 1KJW),  
120 connected via fully-flexible linkers. Using these input structures, we generated 10.000  
121 conformations using EOM (Bernado et al., 2007; Tria et al., 2015) (Ranch), and used the  
122 genetic algorithm (GAJOE) to fit the data recorded at a protein concentration of 60  $\mu$ M. This  
123 yielded a subset of structures representing the final structural ensemble (Figure 1D and  
124 Figure 1E) (Bernado et al., 2007; Tria et al., 2015). The final ensemble had an  $R_{g,mean} =$   
125 52.8 Å and a  $D_{max,mean} = 173.4$  Å. The final structural ensemble points towards that PSD-95  
126 on average adopt more compact conformations in that proposed by the generating  
127 ensemble. We note however that it was necessary to include also extended structures to fit  
128 the obtained SAXS data and around 16% of the structural ensemble had conformations  
129 with a  $D_{max}$  above 200 Å (Figure 1D). This behavior is in overall agreement with previously  
130 published structural data suggesting that PSD-95 both forms extended and compact  
131 conformations (Fomina et al., 2011).

132

### 133 **Multivalent Stg peptides induce LLPS condensate formation when mixed with PSD-** 134 **95**

135 At the PSD, PSD-95 is always bound to other proteins such as the AMPAR auxiliary  
136 subunit Stargazin (Stg), the GluN2B subunit of the NMDAR, adhesion proteins, such as  
137 Neuroligins or other scaffold proteins such as GKAP or SynGAP. Several of the interactions  
138 with PSD-95 are multivalent, often due to oligomeric protein assemblies. An example is Stg,  
139 which forms a complex with AMPAR, where the Stg:AMPA stoichiometry can be from 1:1  
140 to 4:1 (Twomey et al., 2016; Zhao et al., 2016). The Stg C-terminal has previously been  
141 shown to interact with all the PDZ domains of PSD-95, with a preference for the PDZ1-2  
142 tandem over PDZ3 (Pedersen et al., 2017; Sainlos et al., 2011). To mimic the above

143 mentioned difference in oligomeric states for the Stg:AMPAR complex, we designed  
144 peptides which in solution organize as monomers, dimers or trimers, thereby varying the  
145 number of available PDZ binding motifs (PBMs) targeting PSD-95 between 1 and 3 (Figure  
146 2A). The dimeric variant was designed using the General control protein GCN4 (GCN4)  
147 leucine zipper motif, previously found to form a homo-dimeric parallel helical leucine zipper  
148 in solution (Gonzalez et al., 1996), fused to a hexapeptide corresponding to the 6 C-  
149 terminal residues of Stg (RRTPPV), through a short flexible linker, yielding a dimeric Stg C6  
150 variant (dim-Stg, Figure 2A). To disrupt the helical GCN4p1 motif, we inserted two prolines  
151 (mono-Stg), yielding a monomeric conformation of the Stg C-terminal (Hanes et al., 1998;  
152 Leder et al., 1995). To conversely increase the number of PBMs, we also made a trimeric  
153 GCN4p1 variant (tri-Stg, Figure 2C) (Harbury et al., 1994). As expected, we found that both  
154 dim-Stg and tri-Stg displayed a high degree of helicity in solution, wherein the tri-Stg has an  
155 even higher degree of helicity than that of dim-Stg, presumably due to more cooperative  
156 folding, combined with a lower elution volume for tri-Stg than dim-Stg in size exclusion  
157 chromatography, suggesting a larger hydrodynamic radius, while the monomer, mono-Stg,  
158 displayed a random coil like structure, and an elution volume similar to dim-Stg (Figure  
159 S2A-B). Using competitive fluorescence polarization (FP) binding to full length PSD-95  
160 (Zeng et al., 2016b) we found that mono-Stg, dim-Stg and tri-Stg had apparent affinities of  
161  $K_i = 7984$  nM (SEM: [7146;8910] nM, n=6),  $K_i = 237$  nM (SEM: [195;289] nM, n=6) and  $K_i =$   
162  $98$  nM (SEM: [81;119] nM, n=6), respectively (Figure 2B). This demonstrates an affinity  
163 gain of 33- and 81-fold for dim-Stg and tri-Stg, respectively over mono-Stg, which is  
164 comparable to the 25-fold affinity gain seen for prior work on bivalent Stg peptides (Sainlos  
165 et al., 2011).

166 Size exclusion chromatography (SEC) and SEC multiangle light scattering (SEC-  
167 MALS) demonstrated that incubation with either of the peptides did not change the elution

168 volume or molecular weight of PSD-95 (Figure 2C and Figure S2C-F). To our surprise,  
169 however, we found that an increase in dim-Stg and tri-Stg concentration with a fixed PSD-  
170 95 concentration, caused a reduction in the total amount of PSD-95/peptide complex eluting  
171 from the column (Figure 2C). This was validated using SEC-MALS, also substantiating that  
172 no oligomeric PSD-95 eluted from the column (Figure S2C-F). Using Flow induced  
173 dispersion analysis (FIDA) (Pedersen et al., 2019) we found that the hydrodynamic radius  
174 ( $R_H$ ) was seemingly larger for the Stg-bound complexes than it was for PSD-95 in absence  
175 of the Stg peptides, however the  $R_H$  increase was only significant at 36  $\mu$ M tri-Stg (\*,  
176  $p=0.011$ , one-way ANOVA) (Figure S2G). Data spikes in the FIDA data also indicated a  
177 presence of aggregates which we did not see in SEC or SEC-MALS, suggesting that the  
178 oligomers formed were too large to enter the SEC columns (Figure S1H). We investigated  
179 this phenomenon further using a SDS page protein sedimentation assay (Wu et al., 2019;  
180 Zeng et al., 2018; Zeng et al., 2019; Zeng et al., 2016a). We found that both dim-Stg and  
181 tri-Stg, but not monomeric Stg, induced a cloudy phase which could be pelleted upon  
182 centrifugation (Figure 2D). The pellet induction was significant for tri-Stg at 12  $\mu$ M (\*\*,  
183  $p<0.01$ , one-way ANOVA, Dunnett post-test) and 36  $\mu$ M (\*\*\*\*,  $p<0.0001$  one-way ANOVA,  
184 Dunnett post-test) (Figure 2D). To evaluate if the Stg C-terminal peptides induced a LLPS  
185 transition, we performed fluorescence confocal microscopy of Alexa488-labeled PSD-95  
186 and unlabeled peptides. Indeed, we found that mixing dim-Stg and tri-Stg (at 36  $\mu$ M) with  
187 PSD-95 (3  $\mu$ M) induced LLPS droplets (Figure 2E). The formation of LLPS droplets  
188 suggested, that multivalent peptides containing multiple copies of a PBM targeting PSD-95  
189 PDZ domains such as the Stg peptides, are sufficient to induce LLPS when mixed with  
190 PSD-95.

191       Synaptic function is highly dependent on the pH homeostasis on both the extra- and  
192 intracellular side of the postsynaptic membrane. The effect of pH alterations on the protein



193 complex formation in the PSD is currently unknown. We therefore moved on to investigate  
194 the effects of pH on the LLPS assembly of PSD-95 and the Stg peptides. Upon acidification  
195 of the buffer to pH 5.4, we observed formation of a hazy precipitate in the sample tube  
196 suggesting sample precipitation (not shown). Using fluorescence confocal microscopy, we  
197 found that the precipitate, probed with Alexa633-labeled PSD-95 behaved as dynamic  
198 droplets (Figure 2F), suggesting that PSD-95 can spontaneously undergo LLPS formation  
199 in a pH dependent manner, also strengthening the conception that PSD-95 can self-  
200 organize in larger oligomers in a ligand independent manner. We saw that the formed  
201 droplets were dynamic in size, and fluorescence recovery after photo bleaching (FRAP)  
202 experiments consistently demonstrated partial recovery (Figure S2I-K).

203 A recent NMR based study showed that PDZ1-2 can self-associate, and indeed we  
204 also saw that at high concentrations (1.45 mM) that most amide proton resonances in the  
205 PDZ1-2 <sup>1</sup>H-<sup>15</sup>N-HSQC experienced severe line broadening, to an extent where numerous  
206 peaks disappeared (Figure S3A). The line broadening was most likely caused by dynamic  
207 processes between individual PDZ1-2 proteins in the intermediate NMR time scale, since  
208 these were concentration dependent (Figure S3A), and the peaks reappeared at a lower  
209 concentration. We mapped the concentration induced intensity changes (Figure S3B) and  
210 found that the charged and non-polar residues for which the intensity is more than 30%  
211 reduced or increased, accounted for 82% of the residues, compared to 18% for the polar  
212 non-charged residues. Once mapped onto the structure of PDZ1-2 (PDB 3GSL; Figure  
213 S3C), we found that all the residues, with an intensity changes of more than 30% in either  
214 direction, were surface exposed and most of the residues were located on the opposite side  
215 relative to the binding pocket of both PDZ domains, suggesting that these might be involved  
216 in PDZ1-2/PDZ1-2 protein interactions, as have also been suggested from earlier structural  
217 work done on the PDZ1-2 tandem (Rodzli et al., 2020; Sainlos et al., 2011). This may

218 suggest that the PDZ1-2 display several low affinity interactions that may facilitate PSD-95  
219 oligomerization.

220 We next tested whether the ability of dim-Stg and tri-Stg and pH works in an additive  
221 manner to induce LLPS (Figure 2G-H). We found that upon acidification of the buffer there  
222 was a pronounced positive effect on LLPS formation for both dim-Stg and tri-Stg, this was  
223 also shown by SDS-PAGE sedimentation, where it was evident that tri-Stg enhanced the  
224 protein content in the pellet both at pH 6.4 and 5.4 (Figure S2L).

225 Taken together the solution structure of PSD-95 combined with the observation that  
226 PSD-95 can undergo LLPS at acidic pH suggests the presence of weak intra protein  
227 interactions both within a single PSD-95 protein and between individual PSD-95 proteins,  
228 mediated in part by the PDZ1-2 tandem of PSD-95.

229

### 230 **The PDZ1-2 tandem of PSD-95 is sufficient to cause LLPS when mixed with Stg** 231 **peptides**

232 Since PSD-95 is a multi-domain protein, we wanted to evaluate if the PDZ1-2 tandem  
233 of PSD-95 could provide a protein scaffold of sufficient valency to promote LLPS. We found  
234 that dim-Stg and tri-Stg could induce LLPS of Alexa488-labeled PDZ1-2 alone, as seen  
235 from fluorescence confocal microscopy using fluorescence microscopy (Figure 3A and 3B)  
236 and SDS-PAGE sedimentation (Figure S2A), similar to the findings for full-length PSD-95.  
237 To investigate the residues involved in LLPS interaction network with dim-Stg and tri-Stg,  
238 we recorded  $^1\text{H}$ - $^{15}\text{N}$ -HSQC NMR experiments of PSD-95 in complex with the two peptides  
239 (Figure 3C and 3D). The majority of resonances of the two samples experienced severe  
240 line-broadening compared to the absence of the peptides, which is likely caused by the  
241 dynamic properties of the interaction networks in the phase separated droplets. We used  
242 SEC-MALS to estimate the binding valency, and found that both the elution volume and the

243 molecular weight of the eluting complex are consistent with a 1:1 stoichiometry of the  
244 interaction between PDZ1-2 and the Stg peptides at a concentration below the critical LLPS  
245 concentration (Figure 3E and 3F). Taken together these data support that the tandem  
246 PDZ1-2 protein combined with dim-Stg or tri-Stg is sufficient for LLPS formation and  
247 suggest that the LLPS core of PSD-95 is the PDZ1-2 tandem.

248

249 **PSD-95 serves as a reversible, negative modulator of condensate formation**  
250 **governed by multivalent PDZ interactions**

251 Based on earlier observations of the five major synaptic scaffold proteins (PSD-95,  
252 Homer3, Shank3, GKAP and SynGAP, see *Methods*) (Zeng et al., 2018; Zeng et al.,  
253 2016a), and the formation of LLPS droplets upon mixing (Zeng et al., 2018; Zeng et al.,  
254 2019; Zeng et al., 2016a), we expressed and purified these five major synaptic scaffold  
255 proteins. We found that, in absence of PSD-95, the Homer3, Shank3, GKAP and SynGAP  
256 (H-S-G-S) complex, condensed into LLPS droplets (3  $\mu$ M each) (Figure 4A). Surprisingly,  
257 upon incubation with increasing amounts of PSD-95, this phase separation was significantly  
258 reduced in presence of PSD-95 (3  $\mu$ M) (\*\* for Homer3,  $p < 0.001$ ; \*\* for Shank3,  $p < 0.01$ ; \*  
259 for GKAP  $p = 0.0113$ ; \*\* for SynGAP,  $p < 0.01$ ; two-way ANOVA Dunnett post-test) and at 10  
260  $\mu$ M of PSD-95 (\*\* for Homer3,  $p < 0.01$ ; \*\* for Shank3,  $p < 0.01$ ; \* for GKAP  $p = 0.013$ ; \*\* for  
261 SynGAP,  $p < 0.01$ ; two-way ANOVA Dunnett post-test) (Figure 4B). This was confirmed  
262 using confocal microscopy, where we observed LLPS droplets formed by 3  $\mu$ M of H-S-G-S  
263 in the absence of PSD-95 (Figure 4C) while only minor droplets were seen in the presence  
264 of PSD-95 (1  $\mu$ M) (Figure 4D). This effect was also evident upon addition of PSD-95 (8  $\mu$ M)  
265 to pre-existing H-S-G-S condensates (3  $\mu$ M each), probed with Alexa647-labeled Shank3  
266 (0.3  $\mu$ M) and Alexa488-labeled PSD-95 (0.8  $\mu$ M) (Figure 4E). When PSD-95 associated to  
267 the droplets, there was a slow incorporation of PSD-95 into the droplets from the periphery

268 that gradually reduced Shank3 intensity (Figure 4F), which was quantified to ~30%  
269 reduction in Shank3 intensity (Figure 4G). No effect was seen upon addition of PBS (Figure  
270 S4A-B) indicating a PSD-95 dependent disassembly of the H-S-G-S condensate.

271 We next asked how the di- and trimeric Stg peptides would affect the destabilized  
272 condensate of all five major PSD proteins (ePSD). Indeed, condensate formation was  
273 facilitated with increasing concentration of dim-Stg and, in particular, tri-Stg (Figure 4H-I  
274 and Figure S5A-D), but not mono-Stg (Figure S4C and S5E-F), suggesting that the peptide  
275 valency and concentration is critical for ePSD condensate stabilization. The induction of  
276 LLPS in presence of dim-Stg and tri-Stg was validated by confocal microscopy, which  
277 suggested that tri-Stg was much more efficient than mono-Stg and dim-Stg at stabilizing  
278 LLPS in the ePSD (Figure 4K-M). While dim-Stg and tri-Stg could be used to induce LLPS  
279 in the ePSD complex, the H-S-G-S condensates were unaffected by dim-Stg and tri-Stg,  
280 while high concentrations of mono-Stg seemed to reduce pelleting of the H-S-G-S  
281 condensate (Figure 4J and Figure S5G-H).

282 These data demonstrate a critical role of PSD-95 in the modulation of the ePSD  
283 condensates, which in turn is governed by specific multivalent PDZ domain interactions.

284

### 285 **Stg contains multiple PSD-95 binding sites.**

286 It was recently shown that the Stg C-terminus in its full length can induce LLPS when  
287 mixed with PSD-95 alone or in combination with Homer3, Shank3, GKAP and SynGAP.  
288 This effect is inhibited by S-to-D mutations in an S/R rich region (S221-S253, Uniprot:  
289 Q9Y698) positioned, upstream of the PBM (T321-V323), in the membrane proximal region  
290 (Feng et al., 2019b; Zeng et al., 2019). The Stg C-terminus (Figure S6A) was shown to  
291 interact with PDZ2 through the PBM and non-canonically with PDZ1 via the S/R rich region  
292 probably interacting with E/D residues positioned opposite to the canonical PDZ1 binding

293 pocket in PDZ1 (Zeng et al., 2019). To characterize the non-canonical PDZ interaction of  
294 PSD-95 with the Stg C-terminus, we designed and prepared a celluSPOT array (Winkler et  
295 al., 2009; Wu and Li, 2009) of the entire Stg C-terminus consisting of 101 15-mer peptides  
296 (Figure 5A), consecutively shifted one residue towards the C-terminus. The celluSPOT  
297 approach involves coupling of the C-terminal carboxylic acid to the cellulose membrane,  
298 thereby blocking canonical PDZ interactions, allowing us to probe non-canonical PDZ  
299 interactions of the Stg C-terminus with PSD-95. In addition, we included 39 peptides,  
300 carrying the S-to-D mutations in the S/R rich region described earlier (Sumioka et al., 2010;  
301 Tomita et al., 2005), to address putative modulation by phosphorylation.

302 We found that the intensities in the membrane proximal region of Stg (A214-E245),  
303 which overlaps partially with the charged S/R rich region (Figure 5A), were selectively  
304 enhanced upon addition of PSD-95 (1  $\mu\text{M}$  total, 0.9  $\mu\text{M}$  unlabeled PSD-95 and 0.1  $\mu\text{M}$   
305 Alexa633-labeled PSD-95), suggesting a secondary binding site for PSD-95 in the A214-  
306 E245 region (Figure 5A and Figure S6B). Our peptide array further suggested that the S-to-  
307 D variants (Figure S6C) slightly reduced the binding to isolated PSD-95 in the membrane  
308 proximal region, confining the binding region from residues T211-S253 to T215-D241  
309 (Figure S6D). To validate the binding of the S/R rich region of Stg to PSD-95, we then  
310 performed FP on a fluorescently labeled 15-mer peptide (TAMRA-G-  
311 A<sub>222</sub>ITRIPSYRYRYQRR<sub>236</sub>) representing the core binding region and found that PSD-95  
312 indeed bind to Stg<sub>A222-R236</sub> ( $K_d = 14.9 \pm 3.0 \mu\text{M}$ ) (Figure S6E). Interestingly, the S/R rich  
313 region overlaps with binding site of Arc (Zhang et al., 2015), which also show binding to  
314 Stg<sub>A222-R236</sub> ( $K_d = 8.37 \pm 1.25 \mu\text{M}$ ) (Figure S7A-B).

315 Next, adding the remaining components of the ePSD (1  $\mu\text{M}$  of H-S-G-S and 0.9  $\mu\text{M}$   
316 unlabeled PSD-95 and 0.1  $\mu\text{M}$  Alexa633-labeled PSD-95) to the Stg array caused a  
317 potentiation and broadening of the PSD-95 signal now covering the T211-S253 region as

318 well as at the extreme C-terminus (Q304-V323) of Stg (Figure 5B). All ePSD proteins were  
319 also tested individually for binding to the Stg C-terminal peptides, and this resulted in a  
320 measurable intensity in the same membrane proximal region for all proteins (Figure S8A),  
321 suggesting a low specificity interaction, which was supported by FP binding data (Figure  
322 S8B). Moreover, the negative effect of the S-to-D mutations on PSD-95 binding was  
323 maintained in presence of the ePSD complex, in particular in the R225-A252 region (Figure  
324 S8C).

325 The Stg C-terminus has previously been shown to interact also with lipid membranes  
326 in an S-to-D dependent manner. We therefore tested liposome binding to the array and  
327 found that the areas Q219-D251, partially overlapping with the protein binding region, as  
328 well as the C-terminal region Q304-V323 showed liposome binding (Figure 5C), in  
329 accordance with a previously reported lipid binding site of the Stg C-terminal (Sumioka et  
330 al., 2010). This binding largely reflected the charge distribution (Figure S8E) and  
331 accordingly it was potently modulated by S-to-D mutations (Figure S6D and S8C-D).

332 Taken together, the peptide array, binding experiments suggest that the secondary  
333 PSD-95 binding site in Stg C-terminus is confined to the region A214-E245, which largely  
334 overlaps with the lipid binding site covering the region Q219-D251 (Sumioka et al., 2010)  
335 and is consistent with the suggestion that the S/R rich region is also involved in the binding  
336 of PSD-95 in a way which enhances affinity (Zeng et al., 2019).

337

### 338 **Stg<sub>A222-R236</sub> can induce LLPS**

339 As the Stg C-terminal was recently shown to induce LLPS in an R and S-to-D  
340 dependent manner, we wondered whether the 15-mer Stg<sub>A222-R236</sub> peptide, which is part of  
341 the S/R rich region, was sufficient to induce LLPS. Indeed, we found that the Stg<sub>A222-R236</sub>  
342 peptide (100  $\mu$ M) induced LLPS for the ePSD (3  $\mu$ M) (Figure 6A-B, and 6E). However,

343 Stg<sub>A222-R236</sub> (100  $\mu$ M) did not induce LLPS for PSD-95 alone (3  $\mu$ M) at pH 7.4 but LLPS was  
344 observed at the slightly more acidic pH 5.4 (Figure 6D and Figure S9B), similar to what was  
345 observed for PSD-95 in absence of ligands. As demonstrated above, the addition of PSD-  
346 95 to existing H-S-G-S droplets resulted in a reduction in Shank3 intensity, while PSD-95  
347 was slowly taken up into the droplets from the periphery of preexisting droplets (Figure 4E).  
348 When adding Stg<sub>A222-R236</sub> to H-S-G-S droplets, which had first been subjected to addition of  
349 PSD-95, we found that Stg<sub>A222-R236</sub> was taken up rapidly by existing droplets (Figure 6E)  
350 with a flat gradient across the droplets (Figure 6G-I), as opposed to the peripheral  
351 localization seen for PSD-95 (Figure 4E-G). Further, this peripheral localization for PSD-95  
352 was compromised in presence of Stg<sub>A222-R236</sub> droplets, suggesting alterations in the  
353 dynamic protein network (Figure 6G-I).

354 In addition to the integration into existing droplets, Stg<sub>A222-R236</sub> increased the LLPS  
355 formation as evidenced by appearance of new, smaller, droplets over the time of the  
356 experiment (Figure 6J). Besides Stg<sub>A222-R236</sub>, we also generated a 32-mer peptide covering  
357 the entire predicted interaction region of the A214-E245 region (Stg<sub>A214-E245</sub>) (Figure S10).  
358 The SDS-PAGE sedimentation assay showed similar results for Stg<sub>A214-E245</sub> as for Stg<sub>A222-  
359 R236</sub>, however, fluorescence confocal microscopy showed that when Stg<sub>A214-E245</sub> was mixed  
360 with the ePSD the mixture progressed towards a pH dependent (not shown) meso-crystal  
361 like precipitate (Figure S10), similar to literature examples when LLPS systems progress  
362 from the highly dynamic LLPS droplets to less dynamic aggregates and fibrils (Ray et al.,  
363 2020). FRAP showed that the Stg<sub>A214-E245</sub> induced precipitate remained dynamic (Figure  
364 S10).

365 The above sedimentation assays and imaging demonstrated that a 15-mer peptide  
366 comprising residues A222-R236 derived from the Stg C-terminal, while inadequate for

367 formation of LLPS with PSD-95 alone, is sufficient to promote LLPS condensate formation  
368 for the ePSD and reorganize the dynamic network.

369

### 370 **Known inhibitors of the PSD-95 PDZ domains can influence LLPS**

371 Several inhibitors have been developed to target the PDZ domains of PSD-95,  
372 including two promising drug candidates that feature Arg-rich cell penetrating peptides  
373 (CPPs) (Bach et al., 2012; Christensen et al., 2019; Aarts et al., 2002). To potentially bridge  
374 the mechanistic understanding between LLPS and drug discovery, we wanted to investigate  
375 whether the two clinically relevant peptide inhibitors of PSD-95, NA-1 (nerinetide) and  
376 AVLX-144, affected LLPS formation for either PSD-95 or the ePSD. NA-1 is a monomeric  
377 20-mer peptide containing the 9 C-terminal amino acids from the GluN2B NMDAR subunit,  
378 fused to an N-terminal 11-mer peptide from the trans-activator of transcription protein  
379 (TAT), which facilitates cell penetration of NA-1. The clinical investigations of NA-1 have  
380 provided the compound in a dosage of 2.6 mg/kg, which corresponds approximately to 1  
381  $\mu\text{M}$  the compound distributed in the entire body volume. AVLX-144 is likewise, derived from  
382 the GluN2B C-terminal, but is a bivalent inhibitor, also comprising a TAT peptide. Both NA-1  
383 and AVLX-144 targets the first two PDZ domains of PSD-95 through canonical PDZ  
384 interactions (Bach et al., 2012; Aarts et al., 2002) and both adopt a random coil structure in  
385 solution (Figure S11A).

386 We found that NA-1 (36  $\mu\text{M}$ ) induced LLPS when incubated with Alexa633-PSD-95  
387 (30 nM labelled/3  $\mu\text{M}$  unlabeled) at pH below 7.4 (Figure 7A), while AVLX-144 only induced  
388 LLPS at pH below 6.4 (Figure 7B). This was validated using SDS-PAGE sedimentation  
389 (Figure 7C and Figure S11B-C). To show that the pH change did not compromise the  
390 affinity of NA-1 towards PSD-95, we did competitive FP. At pH 5.4, we saw an inverted  
391 competition curve (Figure 7D), suggesting formation of larger molecular assemblies as a



392 function of NA-1 concentration ( $K_{i,app, pH\ 5.4} = 156\ \mu\text{M}$ , SEM interval: [155-158]  $\mu\text{M}$ ). This  
393 suggests that NA-1 can induce LLPS at a more acidic pH of pH 5.4, but importantly also at  
394 very low PSD-95 concentrations ( $[C_{\text{PSD-95}}] = 150\ \text{nM}$ ). Interestingly we observed only minor  
395 changes in  $K_i$  as a function of pH (Figure 7D), in the pH range 6.4-9.4 ( $K_{i,app, pH\ 6.4} = 7.2\ \mu\text{M}$ ,  
396 SEM interval: [6.0-8.4]  $\mu\text{M}$ ;  $K_{i,app, pH\ 7.4} = 4.5\ \mu\text{M}$ , SEM interval: [3.4-5.7]  $\mu\text{M}$ ;  $K_{i,app, pH\ 8.4} = 2.6$   
397  $\mu\text{M}$ , SEM interval: [1.5-3.8]  $\mu\text{M}$ ;  $K_{i,app, pH\ 9.4} = 4.1\ \mu\text{M}$ , SEM interval: [2.9-5.2]  $\mu\text{M}$ ), this was  
398 also the case for saturation binding of 5FAM-labelled dimeric inhibitor to PSD-95 (Figure  
399 S11D).

400 To obtain molecular insight into the mechanism underlying the differential propensity  
401 of NA-1 and AVLX-144 to cause LPPS, we recorded  $^1\text{H}$ - $^{15}\text{N}$ -HSQC NMR experiments of  
402 PDZ1-2 with and without these peptides (Figure 7E-J). Both peptides caused similar  
403 changes of the chemical shifts throughout the primary sequence of PDZ1-2 suggesting  
404 comparable binding for both NA-1 and AVLX-144. Both NA-1 and AVLX-144 perturbed  
405 residues in PDZ2 to a similar extent, while the perturbations in PDZ1 were stronger for  
406 AVLX-144 (Figure 7F-G) than for NA-1 (Figure 7I-J), in concordance with dual occupancy of  
407 both PDZ domains in the PDZ1-2 tandem for AVLX-144 (Bach et al., 2012; Chi et al., 2010;  
408 Aarts et al., 2002). We suspected that the positively charged TAT peptide in NA-1 was able  
409 to utilize the negatively charged patch on PDZ1, as have been suggested to be the  
410 secondary binding site for the S/R rich region of Stg (Zeng et al., 2019), but we did not see  
411 any perturbations indicating this, for neither NA-1 nor AVLX-144. We also tested the 11-mer  
412 TAT peptide alone and Stg<sub>A222-R236</sub>, which did not result in any chemical shift perturbations  
413 in the recorded  $^1\text{H}$ - $^{15}\text{N}$ -HSQCs of PSD-95 (512  $\mu\text{M}$  Stg<sub>A222-R236</sub>/128  $\mu\text{M}$   $^{15}\text{N}$ -PDZ1-2). The  
414 reason for the lack of perturbations might be that the isolated PDZ1 interactions, as  
415 presented earlier, occurs on a timescale which is outside of our experimental window.

416

417 **NA-1 can induce LLPS condensate formation in the ePSD complex**

418 Expanding these findings into the ePSD system, we found that NA-1 could induce  
419 LLPS at 10  $\mu$ M (\* for PSD-95,  $p < 0.0205$ ; ns for Homer3,  $p = 0.0947$ ; ns for Shank3,  
420  $p = 0.0872$ ; \* for GKAP  $p = 0.0252$ ; \* for SynGAP,  $p = 0.0286$ ; two-way ANOVA Dunnett post-  
421 test) and 100  $\mu$ M (\*\* for PSD-95,  $p < 0.001$ ; \*\* for Homer3,  $p < 0.01$ ; \* for Shank3,  $p = 0.0280$ ;  
422 \*\* for GKAP  $p < 0.01$ ; \*\* for SynGAP,  $p < 0.01$ ; two-way ANOVA Dunnett post-test) in the  
423 PSD-95 containing ePSD (Figure 7K and Figure S12). On the other hand, AVLX-144  
424 induced LLPS to a minor extent (Figure 7E and Figure S12) at 10  $\mu$ M (\* for PSD,  $p = 0.0190$ ;  
425 ns for Homer3,  $p = 0.185$ ; ns for Shank3,  $p = 0.910$ ; ns for GKAP,  $p = 0.993$ ; ns for SynGAP,  
426  $p = 0.148$ ; two-way ANOVA Dunnett post-test) and 100  $\mu$ M (\* for PSD,  $p = 0.0357$ ; ns for  
427 Homer3,  $p = 0.117$ ; ns for Shank3,  $p = 0.814$ ; ns for GKAP,  $p = 0.993$ ; ns for SynGAP,  
428  $p = 0.247$ ; two-way ANOVA Dunnett post-test). Mutation of the PBM of AVLX-144 (TDV to  
429 ADA) to generate AVLX-144-AA, a non-binding version, largely compromised the ability to  
430 drive LLPS of the ePSD (Figure S12). The TAT peptide alone (10  $\mu$ M) induced LLPS (\*\* for  
431 PSD-95,  $p < 0.01$ ; ns for Homer3,  $p = 0.05$ ; \* for Shank3,  $p = 0.0189$ ; \* for GKAP  $p = 0.0252$ ; ns  
432 for SynGAP,  $p = 0.0949$ ; two-way ANOVA Dunnett post-test) of the ePSD similar to AVLX-  
433 144 (Figure 7K and Figure S12). Removal of the TAT peptide from AVLX-144, generating  
434 AVLX-125 (UCCB-125), did not alter the ePSD LLPS formation (Figure 7K). AVLX-125 (100  
435  $\mu$ M) pellet formation was only significant for Homer3 and SynGAP (ns for PSD-95,  $p = 0.45$ ; \*  
436 for Homer3,  $p < 0.05$ ; ns for Shank3,  $p = 0.87$ ; ns for GKAP  $p > 0.99$ ; \*\* for SynGAP,  $p = 0.0026$ ;  
437 two-way ANOVA Dunnett post-test) of the ePSD similar to AVLX-144 (Figure 7K and Figure  
438 S12G). Taken together this suggests a novel mechanism for peptide inhibitors of PPIs,  
439 highlighting inhibitors as LLPS drivers in PPI networks, indicating that seemingly inert parts  
440 of the peptide for the specific protein interaction, can facilitate more flexible protein  
441 interaction networks, thus suggesting a novel way of targeting protein-protein interactions.

442

## 443 **DISCUSSION**

444       The recent discovery of phase separation of key PSD components including PSD-95  
445 reveals a highly complex phenomenon and provides a new paradigm for the understanding  
446 of synaptic biology. Since it was shown that proteins massively concentrate in the  
447 condensate droplets, LLPS have emerged as a possible explanation of how the  
448 postsynapse can be immensely enriched in proteins, and how these are sorted solely on  
449 the basis of their protein interaction networks (Alberti et al., 2019; Feng et al., 2019a;  
450 Yoshizawa et al., 2020; Zeng et al., 2018; Zeng et al., 2019; Zeng et al., 2016a).

451       We found that PSD-95 adopts a compact structure in solution, suggesting  
452 intramolecular interactions, which is in good accordance with previous studies. As shown  
453 recently PDZ1-2 can undergo spontaneous oligomerization (Rodzli et al., 2020), a fact that  
454 we also observed when increasing the PDZ1-2 concentration to the mM range. Under  
455 normal circumstances protein concentrations in the mM range is considered non-  
456 physiological, but due to recent developments in cell biology, mainly focused on LLPS  
457 (Feng et al., 2019a; Feng et al., 2019b; Yoshizawa et al., 2020), it seems increasingly  
458 common that protein complexes which undergo LLPS are of high  $\mu\text{M}$  and even mM  
459 concentration in the LLPS droplets (Feng et al., 2019a; Feng et al., 2019b; Yoshizawa et  
460 al., 2020), suggesting that even low affinity and low specificity interactions becomes of high  
461 importance in these supracomplexes.

462       The ability of PSD-95 to take part in LLPS has recently been described in great detail  
463 in pioneering work by Zhang and co-workers (Feng et al., 2019b; Tao et al., 2019; Zeng et  
464 al., 2019; Zeng et al., 2016a). We observed that Shank3, Homer3, GKAP and SynGAP  
465 together undergo LLPS at low concentration and that PSD-95 acts as a negative regulator  
466 for LLPS when mixed with the remaining components. This occurs in absence of a PSD-95

467 PDZ1-2 specific ligand. PSD-95 has earlier been shown to facilitate LLPS in the ePSD  
468 system, but in earlier cases this negative regulatory effect has not been observed. Earlier  
469 work conducted on the ePSD system (Zeng et al., 2018; Zeng et al., 2019) shows that  
470 PSD-95 does not actively participate in LLPS in the absence of a multivalent ligand, a  
471 tetrameric construct of the GluN2B C-terminal, also using the GCN4p1 backbone (Zeng et  
472 al., 2018), however based on our experiments using the multivalent Stg constructs, and  
473 previous publications (Zeng et al., 2018; Zeng et al., 2019; Zeng et al., 2016a), it is evident  
474 that PSD-95 can undergo separate LLPS, which subsequently can incorporate into the  
475 Homer/Shank/GKAP LLPS system, through low affinity GKAP linkage ( $K_D = 176 \mu\text{M}$  (Zeng  
476 et al., 2018)).

477 It is known that low and moderate affinity interactions can push systems towards  
478 LLPS, as is the case here for both the isolated Stg<sub>A222-R236</sub> peptide and the PSD-95  
479 inhibitor, NA-1. This has also been shown earlier for intrinsically disorder proteins, which in  
480 some cases can act as promiscuous LLPS drivers (Protter et al., 2018). The ability to drive  
481 LLPS has also shown earlier that Arg rich peptides can induce LLPS in large protein sets  
482 (Boeynaems et al., 2017).

483 NA-1 and AVLX-144 are both promising clinical drug candidates in the treatment of  
484 acute ischemic stroke (Bach et al., 2019; Hill et al., 2020). In our experiments we were able  
485 to show that NA-1 induced LLPS upon interaction with isolated PSD-95 and also in the  
486 more complex setting of the ePSD, in which case the concentration of NA-1 that induces  
487 LLPS is close to the clinically relevant concentration of NA-1. This suggests that the TAT  
488 peptide used in both NA-1 and AVLX-144 can in some cases bind to a different part of  
489 PSD-95, not being the PDZ1-2, which is not possible for AVLX-144, potentially due to the  
490 high affinity of AVLX-144, which offers less interaction flexibility than NA-1. The ability of  
491 known pharmacologically relevant peptides and the cell penetrating peptide TAT to induce

492 LLPS uncovered here potentially points to a novel molecular mechanism for some of the  
493 neuroprotective effects of these compounds, and in therapeutically relevant concentrations.  
494 The difference in binding for NA-1 and AVLX-144 suggests that AVLX-144 is more tightly  
495 bound to both PDZ1-2 while NA-1, as expected, favors PDZ2 binding, but is also able to  
496 bind PDZ1. The absence of perturbations to the acidic residues in PDZ1, suggests that the  
497 residues responsible for TAT induced LLPS is positioned elsewhere in PSD-95. It will be  
498 interesting to see if the ability to induce LLPS in the very simple ePSD system translates  
499 into functional effects in the treatment of acute ischemic stroke or similar diseases which  
500 relies on the dynamic functions of the PSD.

501

#### 502 **ACKNOWLEDGEMENTS:**

503 We would like to thank Prof. Mingjie Zhang and Prof. Daniel Choquet for providing  
504 plasmids. We would also like to thank Simon Erlendsson for fruitful discussions and  
505 Nabeela Khadim for technical assistance. We also acknowledge the Core Facility for  
506 Integrated Microscopy, Faculty of Health and Medical Sciences, University of Copenhagen  
507 and the cOpenNMR facility (Novo Nordisk Foundation, NNF18OC0032996) at Department  
508 of Biology, University of Copenhagen. We gratefully acknowledge SAXS beamtime at the  
509 P12 beamline at the PETRAIII at DESY, Germany along with help from the beamline  
510 scientist. We also kindly acknowledge the team at FIDABio (Copenhagen, Denmark) for  
511 their great help and assistance. D.E.O. thanks the Carlsberg Foundation (grant nr. CF14-  
512 0284) and the Novo Nordisk Foundation (grant nr. 12953) for support.

513

#### 514 **AUTHOR CONTRIBUTIONS:**

515 N.R.C, K.S and K.L.M conceived the project. N.R.C performed protein expression and  
516 purification, conducted and analyzed data from circular dichroism, size exclusion

517 chromatography, fluorescence polarization, flow induced dispersion analysis, SDS-PAGE  
518 sedimentation assays, fluorescence confocal microscopy and celluSPOT experiments.  
519 N.R.C and L.A performed and analyzed the small angle X-ray scattering experiments.  
520 C.P.P and K.T.E performed and analyzed the NMR experiments. N.R.C., J.N.P and D.E.O.  
521 performed and analyzed the size exclusion chromatography multi angle light scattering  
522 experiments. A.T.S and N.R.C designed multimeric peptides. V.S designed, synthesized  
523 and printed the celluSPOT arrays. M.V.M did LC-MS and UPLC. N.R.C wrote the  
524 manuscript with contributions from all authors.

525

526 **COMPETING INTERESTS.** A patent application has been filed with regards to multimeric  
527 PSD-95 inhibitors.

528

529

530 **REFERENCES**

- 531 Alberti, S., Gladfelter, A., and Mittag, T. (2019). Considerations and Challenges in Studying  
532 Liquid-Liquid Phase Separation and Biomolecular Condensates. *Cell* 176, 419-434.
- 533 Bach, A., Chi, C.N., Pang, G.F., Olsen, L., Kristensen, A.S., Jemth, P., and Strømgaard, K.  
534 (2009). Design and synthesis of highly potent and plasma-stable dimeric inhibitors of the  
535 PSD-95-NMDA receptor interaction. *Angew Chem Int Ed* 48, 9685-9689.
- 536 Bach, A., Clausen, B.H., Kristensen, L.K., Andersen, M.G., Ellman, D.G., Hansen, P.B.L.,  
537 Hasseldam, H., Heitz, M., Özcelik, D., Tuck, E.J., *et al.* (2019). Selectivity, efficacy and  
538 toxicity studies of UCCB01-144, a dimeric neuroprotective PSD-95 inhibitor.  
539 *Neuropharmacology* 150, 100-111.
- 540 Bach, A., Clausen, B.H., Møller, M., Vestergaard, B., Chi, C.N., Round, A., Sørensen, P.L.,  
541 Nissen, K.B., Kastrup, J.S., Gajhede, M., *et al.* (2012). A high-affinity, dimeric inhibitor of  
542 PSD-95 bivalently interacts with PDZ1-2 and protects against ischemic brain damage. *Proc*  
543 *Natl Acad Sci U S A* 109, 3317-3322.
- 544 Bach, A., Eildal, J.N., Stuhr-Hansen, N., Deeskamp, R., Gottschalk, M., Pedersen, S.W.,  
545 Kristensen, A.S., and Strømgaard, K. (2011). Cell-permeable and plasma-stable  
546 peptidomimetic inhibitors of the postsynaptic density-95/N-methyl-D-aspartate receptor  
547 interaction. *J Med Chem* 54, 1333-1346.
- 548 Banani, S.F., Lee, H.O., Hyman, A.A., and Rosen, M.K. (2017). Biomolecular condensates:  
549 organizers of cellular biochemistry. *Nat Rev Mol Cell Biol* 18, 285-298.
- 550 Bayes, A., Collins, M.O., Croning, M.D., van de Lagemaat, L.N., Choudhary, J.S., and  
551 Grant, S.G. (2012). Comparative study of human and mouse postsynaptic proteomes finds  
552 high compositional conservation and abundance differences for key synaptic proteins.  
553 *PLoS One* 7, e46683.

- 554 Bayes, A., and Grant, S.G. (2009). Neuroproteomics: understanding the molecular  
555 organization and complexity of the brain. *Nat Rev Neurosci* 10, 635-646.
- 556 Bayes, A., van de Lagemaat, L.N., Collins, M.O., Croning, M.D., Whittle, I.R., Choudhary,  
557 J.S., and Grant, S.G. (2011). Characterization of the proteome, diseases and evolution of  
558 the human postsynaptic density. *Nat Neurosci* 14, 19-21.
- 559 Bernado, P., Mylonas, E., Petoukhov, M.V., Blackledge, M., and Svergun, D.I. (2007).  
560 Structural characterization of flexible proteins using small-angle X-ray scattering. *J Am*  
561 *Chem Soc* 129, 5656-5664.
- 562 Bissen, D., Foss, F., and Acker-Palmer, A. (2019). AMPA receptors and their minions:  
563 auxiliary proteins in AMPA receptor trafficking. *Cell Mol Life Sci* 76, 2133-2169.
- 564 Blanchet, C.E., Spilotros, A., Schwemmer, F., Graewert, M.A., Kikhney, A., Jeffries, C.M.,  
565 Franke, D., Mark, D., Zengerle, R., Cipriani, F., *et al.* (2015). Versatile sample environments  
566 and automation for biological solution X-ray scattering experiments at the P12 beamline  
567 (PETRA III, DESY). *J Appl Crystallogr* 48, 431-443.
- 568 Boeynaems, S., Bogaert, E., Kovacs, D., Konijnenberg, A., Timmerman, E., Volkov, A.,  
569 Guharoy, M., De Decker, M., Jaspers, T., Ryan, V.H., *et al.* (2017). Phase Separation of  
570 C9orf72 Dipeptide Repeats Perturbs Stress Granule Dynamics. *Mol Cell* 65, 1044-1055  
571 e1045.
- 572 Chen, X., Nelson, C.D., Li, X., Winters, C.A., Azzam, R., Sousa, A.A., Leapman, R.D.,  
573 Gainer, H., Sheng, M., and Reese, T.S. (2011). PSD-95 is required to sustain the molecular  
574 organization of the postsynaptic density. *J Neurosci* 31, 6329-6338.
- 575 Chi, C.N., Bach, A., Gottschalk, M., Kristensen, A.S., Strømgaard, K., and Jemth, P. (2010).  
576 Deciphering the kinetic binding mechanism of dimeric ligands using a potent plasma-stable  
577 dimeric inhibitor of postsynaptic density protein-95 as an example. *J Biol Chem* 285, 28252-  
578 28260.



579 Christensen, N.R., Čalyševa, J., Fernandes, E.F.A., Lüchow, S., Clemmensen, L.S.,  
580 Haugaard-Kedström, L.M., and Strømgaard, K. (2019). PDZ domains as drug targets. *Adv.*  
581 *Ther.* 2, 1800143.

582 Delaglio, F., Grzesiek, S., Vuister, G.W., Zhu, G., Pfeifer, J., and Bax, A. (1995). NMRPipe:  
583 a multidimensional spectral processing system based on UNIX pipes. *J Biomol NMR* 6,  
584 277-293.

585 Distler, U., Schmeisser, M.J., Pelosi, A., Reim, D., Kuharev, J., Weiczner, R., Baumgart, J.,  
586 Boeckers, T.M., Nitsch, R., Vogt, J., *et al.* (2014). In-depth protein profiling of the  
587 postsynaptic density from mouse hippocampus using data-independent acquisition  
588 proteomics. *Proteomics* 14, 2607-2613.

589 Dosztanyi, Z. (2018). Prediction of protein disorder based on IUPred. *Protein Sci* 27, 331-  
590 340.

591 Dosztanyi, Z., Csizmok, V., Tompa, P., and Simon, I. (2005). The pairwise energy content  
592 estimated from amino acid composition discriminates between folded and intrinsically  
593 unstructured proteins. *J Mol Biol* 347, 827-839.

594 Erlendsson, S., Thorsen, T.S., Vauquelin, G., Ammendrup-Johnsen, I., Wirth, V., Martinez,  
595 K.L., Teilum, K., Gether, U., and Madsen, K.L. (2019). Mechanisms of PDZ domain scaffold  
596 assembly illuminated by use of supported cell membrane sheets. *Elife* 8: e39180.

597 Feng, Z., Chen, X., Wu, X., and Zhang, M. (2019a). Formation of biological condensates via  
598 phase separation: Characteristics, analytical methods, and physiological implications. *J Biol*  
599 *Chem* 294, 14823-14835.

600 Feng, Z., Chen, X., Zeng, M., and Zhang, M. (2019b). Phase separation as a mechanism  
601 for assembling dynamic postsynaptic density signalling complexes. *Curr Opin Neurobiol* 57,  
602 1-8.

603 Florio, S.K., Loh, C., Huang, S.M., Iwamaye, A.E., Kitto, K.F., Fowler, K.W., Treiberg, J.A.,  
604 Hayflick, J.S., Walker, J.M., Fairbanks, C.A., *et al.* (2009). Disruption of nNOS-PSD95  
605 protein-protein interaction inhibits acute thermal hyperalgesia and chronic mechanical  
606 allodynia in rodents. *Br J Pharmacol* 158, 494-506.

607 Fomina, S., Howard, T.D., Sleator, O.K., Golovanova, M., O'Ryan, L., Leyland, M.L.,  
608 Grossmann, J.G., Collins, R.F., and Prince, S.M. (2011). Self-directed assembly and  
609 clustering of the cytoplasmic domains of inwardly rectifying Kir2.1 potassium channels on  
610 association with PSD-95. *Biochim Biophys Acta* 1808, 2374-2389.

611 Gonzalez, L., Jr., Woolfson, D.N., and Alber, T. (1996). Buried polar residues and structural  
612 specificity in the GCN4 leucine zipper. *Nat Struct Biol* 3, 1011-1018.

613 Grant, S.G.N. (2019). Synapse diversity and synaptome architecture in human genetic  
614 disorders. *Hum Mol Genet* 28, R219-R225.

615 Hanes, J., Jermutus, L., Weber-Bornhauser, S., Bosshard, H.R., and Pluckthun, A. (1998).  
616 Ribosome display efficiently selects and evolves high-affinity antibodies in vitro from  
617 immune libraries. *Proc Natl Acad Sci U S A* 95, 14130-14135.

618 Harbury, P.B., Kim, P.S., and Alber, T. (1994). Crystal structure of an isoleucine-zipper  
619 trimer. *Nature* 371, 80-83.

620 Hill, M.D., Goyal, M., Menon, B.K., Nogueira, R.G., McTaggart, R.A., Demchuk, A.M.,  
621 Poppe, A.Y., Buck, B.H., Field, T.S., Dowlatshahi, D., *et al.* (2020). Efficacy and safety of  
622 nerinetide for the treatment of acute ischaemic stroke (ESCAPE-NA1): a multicentre,  
623 double-blind, randomised controlled trial. *Lancet* 395, 878-887.

624 Hu, Z., Bian, X., Liu, X., Zhu, Y., Zhang, X., Chen, S., Wang, K., and Wang, Y. (2013).  
625 Honokiol protects brain against ischemia-reperfusion injury in rats through disrupting  
626 PSD95-nNOS interaction. *Brain Res* 1491, 204-212.

627 Janezic, E.M., Harris, D.A., Dinh, D., Lee, K.S., Stewart, A., Hinds, T.R., Hsu, P.L., Zheng,  
628 N., and Hague, C. (2019). Scribble co-operatively binds multiple alpha1D-adrenergic  
629 receptor C-terminal PDZ ligands. *Sci Rep* 9, 14073.

630 Kazimierczuk, K., and Orekhov, V.Y. (2011). Accelerated NMR spectroscopy by using  
631 compressed sensing. *Angew Chem Int Ed* 50, 5556-5559.

632 Kikhney, A.G., and Svergun, D.I. (2015). A practical guide to small angle X-ray scattering  
633 (SAXS) of flexible and intrinsically disordered proteins. *FEBS Lett* 589, 2570-2577.

634 Leder, L., Berger, C., Bornhauser, S., Wendt, H., Ackermann, F., Jelesarov, I., and  
635 Bosshard, H.R. (1995). Spectroscopic, calorimetric, and kinetic demonstration of  
636 conformational adaptation in peptide-antibody recognition. *Biochemistry* 34, 16509-16518.

637 Lee, W.H., Xu, Z., Ashpole, N.M., Hudmon, A., Kulkarni, P.M., Thakur, G.A., Lai, Y.Y., and  
638 Hohmann, A.G. (2015). Small molecule inhibitors of PSD95-nNOS protein-protein  
639 interactions as novel analgesics. *Neuropharmacology* 97, 464-475.

640 Long, J.F., Tochio, H., Wang, P., Fan, J.S., Sala, C., Niethammer, M., Sheng, M., and  
641 Zhang, M. (2003). Supramodular structure and synergistic target binding of the N-terminal  
642 tandem PDZ domains of PSD-95. *J Mol Biol* 327, 203-214.

643 Madsen, K.L., Beuming, T., Niv, M.Y., Chang, C.W., Dev, K.K., Weinstein, H., and Gether,  
644 U. (2005). Molecular determinants for the complex binding specificity of the PDZ domain in  
645 PICK1. *J Biol Chem* 280, 20539-20548.

646 McGee, A.W., Dakoji, S.R., Olsen, O., Bredt, D.S., Lim, W.A., and Prehoda, K.E. (2001).  
647 Structure of the SH3-guanylate kinase module from PSD-95 suggests a mechanism for  
648 regulated assembly of MAGUK scaffolding proteins. *Mol Cell* 8, 1291-1301.

649 Meszaros, B., Erdos, G., and Dosztanyi, Z. (2018). IUPred2A: context-dependent prediction  
650 of protein disorder as a function of redox state and protein binding. *Nucleic Acids Res* 46,  
651 W329-W337.

- 652 Meszaros, B., Simon, I., and Dosztanyi, Z. (2009). Prediction of protein binding regions in  
653 disordered proteins. *PLoS Comput Biol* 5, e1000376.
- 654 Nissen, K.B., Haugaard-Kedstrom, L.M., Wilbek, T.S., Nielsen, L.S., Aberg, E., Kristensen,  
655 A.S., Bach, A., Jemth, P., and Strømgaard, K. (2015). Targeting protein-protein interactions  
656 with trimeric ligands: high affinity inhibitors of the MAGUK protein family. *PLoS One* 10,  
657 e0117668.
- 658 O'Rourke, N.A., Weiler, N.C., Micheva, K.D., and Smith, S.J. (2012). Deep molecular  
659 diversity of mammalian synapses: why it matters and how to measure it. *Nat Rev Neurosci*  
660 13, 365-379.
- 661 Pedersen, M.E., Ostergaard, J., and Jensen, H. (2019). Flow-Induced Dispersion Analysis  
662 (FIDA) for Protein Quantification and Characterization. *Methods Mol Biol* 1972, 109-123.
- 663 Pedersen, S.W., Albertsen, L., Moran, G.E., Levesque, B., Pedersen, S.B., Bartels, L.,  
664 Wapenaar, H., Ye, F., Zhang, M., Bowen, M.E., *et al.* (2017). Site-Specific Phosphorylation  
665 of PSD-95 PDZ Domains Reveals Fine-Tuned Regulation of Protein-Protein Interactions.  
666 *ACS Chem Biol* 12, 2313-2323.
- 667 Piserchio, A., Salinas, G.D., Li, T., Marshall, J., Spaller, M.R., and Mierke, D.F. (2004).  
668 Targeting specific PDZ domains of PSD-95; structural basis for enhanced affinity and  
669 enzymatic stability of a cyclic peptide. *Chem Biol* 11, 469-473.
- 670 Protter, D.S.W., Rao, B.S., Van Treeck, B., Lin, Y., Mizoue, L., Rosen, M.K., and Parker, R.  
671 (2018). Intrinsically Disordered Regions Can Contribute Promiscuous Interactions to RNP  
672 Granule Assembly. *Cell Rep* 22, 1401-1412.
- 673 Ray, S., Singh, N., Kumar, R., Patel, K., Pandey, S., Datta, D., Mahato, J., Panigrahi, R.,  
674 Navalkar, A., Mehra, S., *et al.* (2020). alpha-Synuclein aggregation nucleates through  
675 liquid-liquid phase separation. *Nat Chem* 12, 705-716.

676 Rodzli, N.A., Lockhart-Cairns, M.P., Levy, C.W., Chipperfield, J., Bird, L., Baldock, C., and  
677 Prince, S.M. (2020). The Dual PDZ Domain from Postsynaptic Density Protein 95 Forms a  
678 Scaffold with Peptide Ligand. *Biophys J* 119, 667-689.

679 Sainlos, M., Tigaret, C., Poujol, C., Olivier, N.B., Bard, L., Breillat, C., Thiolon, K., Choquet,  
680 D., and Imperiali, B. (2011). Biomimetic divalent ligands for the acute disruption of synaptic  
681 AMPAR stabilization. *Nat Chem Biol* 7, 81-91.

682 Skinner, S.P., Fogh, R.H., Boucher, W., Ragan, T.J., Mureddu, L.G., and Vuister, G.W.  
683 (2016). CcpNmr AnalysisAssign: a flexible platform for integrated NMR analysis. *J Biomol*  
684 *NMR* 66, 111-124.

685 Stiffler, M.A., Chen, J.R., Grantcharova, V.P., Lei, Y., Fuchs, D., Allen, J.E., Zaslavskaja,  
686 L.A., and MacBeath, G. (2007). PDZ domain binding selectivity is optimized across the  
687 mouse proteome. *Science* 317, 364-369.

688 Stiffler, M.A., Grantcharova, V.P., Sevecka, M., and MacBeath, G. (2006). Uncovering  
689 quantitative protein interaction networks for mouse PDZ domains using protein microarrays.  
690 *J Am Chem Soc* 128, 5913-5922.

691 Sumioka, A., Yan, D., and Tomita, S. (2010). TARP phosphorylation regulates synaptic  
692 AMPA receptors through lipid bilayers. *Neuron* 66, 755-767.

693 Tao, W., Ma, C., Bembien, M.A., Li, K.H., Burlingame, A.L., Zhang, M., and Nicoll, R.A.  
694 (2019). Mechanisms underlying the synaptic trafficking of the glutamate delta receptor  
695 GluD1. *Mol Psychiatry* 24, 1451-1460.

696 Tavares, G.A., Panepucci, E.H., and Brunger, A.T. (2001). Structural characterization of the  
697 intramolecular interaction between the SH3 and guanylate kinase domains of PSD-95. *Mol*  
698 *Cell* 8, 1313-1325.

- 699 Tomita, S., Stein, V., Stocker, T.J., Nicoll, R.A., and Brecht, D.S. (2005). Bidirectional  
700 synaptic plasticity regulated by phosphorylation of stargazin-like TARPs. *Neuron* 45, 269-  
701 277.
- 702 Tria, G., Mertens, H.D., Kachala, M., and Svergun, D.I. (2015). Advanced ensemble  
703 modelling of flexible macromolecules using X-ray solution scattering. *IUCrJ* 2, 207-217.
- 704 Trinidad, J.C., Thalhammer, A., Specht, C.G., Lynn, A.J., Baker, P.R., Schoepfer, R., and  
705 Burlingame, A.L. (2008). Quantitative analysis of synaptic phosphorylation and protein  
706 expression. *Mol Cell Proteomics* 7, 684-696.
- 707 Twomey, E.C., Yelshanskaya, M.V., Grassucci, R.A., Frank, J., and Sobolevsky, A.I.  
708 (2016). Elucidation of AMPA receptor-stargazin complexes by cryo-electron microscopy.  
709 *Science* 353, 83-86.
- 710 Winkler, D.F., Hilpert, K., Brandt, O., and Hancock, R.E. (2009). Synthesis of peptide arrays  
711 using SPOT-technology and the CelluSpots-method. *Methods Mol Biol* 570, 157-174.
- 712 Witte, M.D., Theile, C.S., Wu, T., Guimaraes, C.P., Blom, A.E., and Ploegh, H.L. (2013).  
713 Production of unnaturally linked chimeric proteins using a combination of sortase-catalyzed  
714 transpeptidation and click chemistry. *Nat Protoc* 8, 1808-1819.
- 715 Wu, C., and Li, S.S. (2009). CelluSpots: a reproducible means of making peptide arrays for  
716 the determination of SH2 domain binding specificity. *Methods Mol Biol* 570, 197-202.
- 717 Wu, S., Yue, Y., Tian, H., Tao, L., Wang, Y., Xiang, J., Wang, S., and Ding, H. (2014).  
718 Tramiprosate protects neurons against ischemic stroke by disrupting the interaction  
719 between PSD95 and nNOS. *Neuropharmacology* 83, 107-117.
- 720 Wu, X., Cai, Q., Shen, Z., Chen, X., Zeng, M., Du, S., and Zhang, M. (2019). RIM and RIM-  
721 BP Form Presynaptic Active-Zone-like Condensates via Phase Separation. *Mol Cell* 73,  
722 971-984 e975.

- 723 Ye, F., Zeng, M., and Zhang, M. (2018). Mechanisms of MAGUK-mediated cellular  
724 junctional complex organization. *Curr Opin Struct Biol* 48, 6-15.
- 725 Yoshizawa, T., Nozawa, R.S., Jia, T.Z., Saio, T., and Mori, E. (2020). Biological phase  
726 separation: cell biology meets biophysics. *Biophys Rev* 12, 519-539.
- 727 Zeng, M., Chen, X., Guan, D., Xu, J., Wu, H., Tong, P., and Zhang, M. (2018).  
728 Reconstituted Postsynaptic Density as a Molecular Platform for Understanding Synapse  
729 Formation and Plasticity. *Cell* 174, 1172-1187 e1116.
- 730 Zeng, M., Diaz-Alonso, J., Ye, F., Chen, X., Xu, J., Ji, Z., Nicoll, R.A., and Zhang, M.  
731 (2019). Phase Separation-Mediated TARP/MAGUK Complex Condensation and AMPA  
732 Receptor Synaptic Transmission. *Neuron* 104, 529-543 e526.
- 733 Zeng, M., Shang, Y., Araki, Y., Guo, T., Haganir, R.L., and Zhang, M. (2016a). Phase  
734 Transition in Postsynaptic Densities Underlies Formation of Synaptic Complexes and  
735 Synaptic Plasticity. *Cell* 166, 1163-1175 e1112.
- 736 Zeng, M., Shang, Y., Guo, T., He, Q., Yung, W.H., Liu, K., and Zhang, M. (2016b). A  
737 binding site outside the canonical PDZ domain determines the specific interaction between  
738 Shank and SAPAP and their function. *Proc Natl Acad Sci U S A* 113, E3081-3090.
- 739 Zhang, J., Lewis, S.M., Kuhlman, B., and Lee, A.L. (2013). Supertertiary structure of the  
740 MAGUK core from PSD-95. *Structure* 21, 402-413.
- 741 Zhang, W., Wu, J., Ward, M.D., Yang, S., Chuang, Y.A., Xiao, M., Li, R., Leahy, D.J., and  
742 Worley, P.F. (2015). Structural basis of arc binding to synaptic proteins: implications for  
743 cognitive disease. *Neuron* 86, 490-500.
- 744 Zhao, Y., Chen, S., Yoshioka, C., Bacongus, I., and Gouaux, E. (2016). Architecture of fully  
745 occupied GluA2 AMPA receptor-TARP complex elucidated by cryo-EM. *Nature* 536, 108-  
746 111.

747 Zhu, J., Zhou, Q., Shang, Y., Li, H., Peng, M., Ke, X., Weng, Z., Zhang, R., Huang, X., Li,  
748 S.S.C., *et al.* (2017). Synaptic Targeting and Function of SAPAPs Mediated by  
749 Phosphorylation-Dependent Binding to PSD-95 MAGUKs. *Cell Rep* 21, 3781-3793.  
750 Aarts, M., Liu, Y., Liu, L., Besshoh, S., Arundine, M., Gurd, J.W., Wang, Y.T., Salter, M.W.,  
751 and Tymianski, M. (2002). Treatment of ischemic brain damage by perturbing NMDA  
752 receptor- PSD-95 protein interactions. *Science* 298, 846-850.

753

754 **CONTACT FOR REAGENT AND RESOURCE SHARING:**

755 Information and request for sharing of reagents, plasmids etc. should be directed to  
756 Lead contacts, Kristian Strømgaard ([kristian.stromgaard@sund.ku.dk](mailto:kristian.stromgaard@sund.ku.dk)) or Kenneth  
757 Lindegaard Madsen ([kennethma@sund.ku.dk](mailto:kennethma@sund.ku.dk))

758

759



## 760 **METHODS DETAILS:**

### 761 **Plasmid preparation**

762 Plasmids encoding FL-PSD-95 (32M3C-PSD-95 FL),  $\Delta$ N-PSD-95 (32M3C-PSD-95 61-724),  
763 Homer3 (M3C-Homer 3 EVH1-CC WT), Shank3 (M3C-Shank3 NPDZ-HBS-CBS-SAM  
764 M1718E), GKAP (32M3C-GKAP 3GBR-CT) and SynGAP (MG3C-SynGAP CC-PBM WT)  
765 was a kind gift from Prof. Mingjie. Zhang (The Division of Life Science, Hong Kong  
766 University of Science and Technology). In brief, all constructs were previously cloned into a  
767 pET32a containing an N-terminal thioredoxin (TRX) tag or a streptococcal protein G (GB1)  
768 tag followed by a 6xHis affinity tag and a Prescission C3 protease site, followed by the  
769 protein of interest as described in (Zeng et al., 2018; Zeng et al., 2019; Zeng et al., 2016a).

770 Stargazin AA variant was prepared using the QuickChange site directed mutagenesis  
771 kit (Agilent Technologies, USA), using stargazin WT (A kind gift from D. Choquet, IINS,  
772 Bordeaux, France) as the template and the following primers, 3'-  
773 CCGCCGGACCGCCCCCGCCTAAGGATCCGAAGGGC-5' and 5'-  
774 GCCCTTCGGATCCTTAGGCGGGGGCGGTCCGGCGG-3'.

775 DNA encoding rat Arc 195-364 (Uniprot: Q63053) was ordered from ThermoFischer  
776 with an 3'-BamHI and a EcoRI site followed by a FactorXa protease site and the Arc 195-  
777 364 coding sequence, followed by a 5'HindIII, NotI and XhoI cleavage site. The plasmid  
778 was inset into a pGEX4T1 vector using the BamHI and XhoI sites, resulting in a construct  
779 encoding an N-terminal GST followed by a thrombin and a factorXa protease site followed  
780 by rat Arc 195-364.

781

### 782 **Recombinant protein expression and purification**

783 Plasmids encoding FL-PSD-95 (32M3C-PSD-95 FL 1-724),  $\Delta$ N-PSD-95 (32M3C-PSD-95  
784 61-724), Homer3 (M3C-Homer 3 EVH1-CC WT), Shank3 (M3C-Shank3 NPDZ-HBS-CBS-

785 SAM M1718E), GKAP (32M3C-GKAP 3GBR-CT), SynGAP (MG3C-SynGAP CC-PBM WT)  
786 and GST-Arc 195-364 were grown in BL21-DE3-pLysS *E. coli* in LB medium supplemented  
787 with 100 µg/mL ampicillin (HelloBio, #HB4322) and 25 µg/mL chloramphenicol (Sigma,  
788 C0378). The growth was induced at OD<sub>600</sub> 0.6-0.8 with 0.5-1 mM IPTG (Sigma  
789 10724815001) and cultures were grown for 16 hrs at 18°C shaking at 170 rpm. Cells were  
790 harvested at 7000 g and frozen at -80 °C until purification. Pelleted cells were suspended in  
791 lysis buffer containing 50 mM Tris (Sigma 93362) (pH 8.0), 300 mM NaCl (S9888), 1 mM  
792 TCEP (Sigma C4706), half a tablet of cOmplete™ Protease Inhibitor Cocktail (Sigma  
793 11697498001) and 2.5 µg/mL Deoxyribonuclease I (Sigma D5025) and sonicated (Branson  
794 Sonifier 250, 3 mm round tip, 40% output, 70/30 pulse) on ice until solution became  
795 homogeneous. Lysate was centrifuged at 36.000 g for 30 min at 20 °C and supernatant was  
796 collected and purified using affinity chromatography. 6xHis proteins were purified using a  
797 HisTrap HP 5 mL column (GE Life science 17524701) using an imidazole gradient from 10-  
798 500 mM imidazole (Sigma 56749). GST-Arc was purified by addition of 700 µL/L culture  
799 Glutathione Sepharose 4B beads (GE Life Science, 17075605) in lysis buffer. The GST  
800 beads were washed using centrifugation (4000 g for 5 min at 25 °C) followed by removal of  
801 supernatant and addition of 50 mM Tris (pH 7.4), 300 mM NaCl, 10 mM EDTA, 1 mM  
802 TCEP, this step was repeated twice, followed by transfer of beads to a single use gravity  
803 column (BioRad 7326008), followed by three on column washes. The protein was eluted  
804 using 10 mM reduced GSH (Sigma G4251) in 50 mM Tris (pH 7.4), 300 mM NaCl, 10 mM  
805 EDTA, 1mM TCEP. In case of both 6xHis and GST tagged protein, the affinity  
806 chromatography was followed by buffer change and purification using size exclusion  
807 chromatography (HiLoad 16/600 Superdex 200 pg, GE Life science 28989335) in 50 mM  
808 Tris (pH 8.0), 300 mM NaCl, 10 mM EDTA, 1 mM TCEP. Mass and purity was validated  
809 using LC-MS and UPLC to be >93% for all purified proteins where concentrated to a

810 suitable concentration, aliquoted and flash frozen in liquid nitrogen. Before fluorescence  
811 labeling and use in assays protein was exchanged into PBS-TECP (PBS-TCEP) using  
812 NAP-5 columns (GE Life science #17085301), pre-equilibrated in PBS-TCEP.

813

#### 814 **Protein labeling**

815 Before labelling 1 mg of solid dye (NHS-AlexaFlour647, ThermoFischer A20006; NHS-  
816 AlexaFlour568, ThermoFischer A20103; C5 Maleimide-AlexaFluor633, ThermoFischer  
817 A20342; AlexaFluor488 C5 maleimide) was diluted into 10 $\mu$ L DMSO (Sigma #D2650) and  
818 aliquoted (0.02 mg/tube) and DMSO was evaporated using vacuum evaporation, aliquots  
819 were stored at -20 °C until usage. For protein labeling, dyes, were dissolved in DMSO and  
820 purified protein in PBS-TCEP was incubate with respective dye for 1-2 h. For NHS  
821 reactions, the reaction was quenched by addition of 100 mM Tris (pH 7.4). Excess dye and  
822 Tris was removed using two consecutive NAP5 columns equilibrated with PBS-TCEP.  
823 Protein and dye concentration was measured by NanoDrop 3000 (ThermoFischer). For  
824 confocal imaging fluorescent protein was diluted to a final ratio of 1/10 with unlabeled  
825 protein.

826

#### 827 **Peptide array synthesis**

828  $\mu$ SPOT peptide arrays (CelluSpots, Intavis AG, Cologne, Germany) were synthesized using  
829 a ResPepSL synthesizer (Intavis AG) on acid labile, amino functionalized, cellulose  
830 membrane discs (Intavis AG) containing 9-fluorenylmethyloxycarbonyl- $\beta$ -alanine (Fmoc- $\beta$ -  
831 Ala) linkers (minimum loading 1.0  $\mu$ mol/cm). Synthesis was initiated by Fmoc deprotection  
832 using 20% piperidine in *N*-methylpyrrolidone (NMP) (1  $\times$  2 and 1  $\times$  4  $\mu$ L, 3 and 5 min,  
833 respectively) followed by washing with dimethylformamide (DMF, 7  $\times$  100  $\mu$ L per disc) and  
834 ethanol (EtOH, 3  $\times$  300  $\mu$ L per disc). Peptide chain elongation was achieved using 1.2  $\mu$ L of

835 coupling solution consisting of preactivated amino acids (0.5 M) with 2-(1-benzotriazole-1-  
836 yl)-1,1,3,3-tetramethyluronium hexafluorophosphate (0.5 M) and *N,N*-diisopropylethylamine  
837 (DIPEA) in NMP (2:1:1, amino acid:HBTU:DIPEA). The couplings were carried out 7 times  
838 (20 min for the first coupling and 30 min for the rest), and subsequently, the membrane was  
839 capped twice with capping mixture (5% acidic anhydride in NMP), followed by washes with  
840 DMF (7 × 100 µL per disc). After chain elongation, final Fmoc deprotection was performed  
841 with 20% piperidine in NMP (3 × 4 µL, 5 min each), followed by 6 washes with DMF,  
842 subsequent N-terminal acetylation with capping mixture (3 × 4 µL, 5 min each) and final  
843 washes with DMF (7 × 100 µL per disc) and EtOH (7 × 200 µL per disc). Dried cellulose  
844 membrane discs were transferred to 96 deep-well blocks and were treated with the side-  
845 chain deprotection solution consisting of 80% trifluoroacetic acid (TFA), 12% DCM, 5% H<sub>2</sub>O,  
846 and 3% triisopropylsilane (TIPS) (150 µL per well) for 1.5 h at room temperature.  
847 Afterwards, the deprotection solution was removed, and the discs were solubilized  
848 overnight at room temperature using a solvation mixture containing 88.5% TFA, 4%  
849 trifluoromethanesulfonic acid (TFMSA), 5% H<sub>2</sub>O, and 2.5% TIPS (250 µL per well). The  
850 resulting peptide-cellulose conjugates were precipitated with ice-cold diethyl ether (1 mL  
851 per well) and spun down at 1000 rpm for 90 min, followed by an additional wash of the  
852 formed pellet with ice-cold diethyl ether. The resulting pellets were re-dissolved in dimethyl  
853 sulfoxide (DMSO, 500 µL per well) to give final stocks, which were transferred to a 384-well  
854 plate and printed (in duplicates) on white coated CelluSpots blank slides (76 × 26 mm,  
855 Intavis AG) using a SlideSpotter robot (Intavis AG).

856

### 857 **Peptide synthesis**

858 Purified (>95% purity) TAT11 (YGRKKRRQRRR), mono-Stg (biotin-ahx-  
859 RMKQLEPKVEELLPKNYHLENEVARLKKLVGGGSRRTTPV), dim-Stg (biotin-ahx-

860 RMKQLEDKVEELLSKNYHLENEVARLKKLVGGGSRRTTPV), tri-Stg (biotin-ahx-  
861 RIKQIEDKIEEILSKIYHIENEIARIKKLIGGGGSRRTTPV) were ordered and from  
862 TAGCopenhagen (Denmark). Purified (>95% purity) AVLX-144 was ordered from WuXi  
863 peptides (China). UCCB-125 and AVLX-144-AA were synthesized in house using  
864 previously reported synthesis (Bach et al., 2009; Bach et al., 2012).

865 The synthesis of the Stg<sub>A222-R236</sub> peptide (GAITRIPSYRYRYQRR), using Fmoc-based  
866 solid phase peptide synthesis, was carried on a Prelude X, induction heating assisted,  
867 peptide synthesizer (Gyros Protein Technologies, Tucson, AZ, USA) with 10 mL glass  
868 reaction vessel using preloaded Wang-resins (100–200 mesh). All reagents were prepared  
869 as solutions in DMF: Fmoc-protected amino acids (0.2 M), *O*-(1*H*-6-chlorobenzotriazole-1-  
870 yl)-1,1,3,3-tetramethyluronium hexafluorophosphate (HCTU, 0.5 M) and DIPEA, 1.0 M.  
871 Coupling steps were carried out using the following protocol: deprotection (20% piperidine  
872 in DMF, 2 × 2 min, room temperature, 300 rpm shaking), coupling (2 × 5 min, 75 °C, 300  
873 rpm shaking, for Arg and His couplings 2 × 5 min, 50 °C, 300 rpm shaking). Amino acids  
874 were double coupled using amino acid/HCTU/DIPEA (ratio 1:1.25:2.5) in 5-fold excess over  
875 the resin loading to achieve peptide sequence elongation.

876 N-terminal labeling of peptide A222-R236 with 5 (and 6)-carboxytetramethylrhodamine  
877 (TAMRA, Anaspec Inc.) was performed on resin, by coupling TAMRA for 16 h at room  
878 temperature using a mixture of 1.5:1.5:3 [TAMRA:benzotriazol-1-  
879 yloxy)tripyrrolidinophosphonium hexafluorophosphate (PyBOP): DIPEA] in NMP (Witte et  
880 al., 2013). The coupling was finalized with extensive washes of resin with DMF and DCM.

881 The synthesized peptides were cleaved from the resin using a mixture of 90:2.5:2.5:2.5:2.5  
882 (TFA:H<sub>2</sub>O:TIPS:1,2-ethanedithiol (EDT):thioanisole) for 2 h at room temperature. After  
883 cleavage the peptide was precipitated with an ice-cold diethyl ether and centrifuged at 3500  
884 rpm for 10 min at 4 °C. The resulting peptide precipitate was re-dissolved in 50:50:0.1

885 (H<sub>2</sub>O:CH<sub>3</sub>CN:TFA) and lyophilized. Purification of the crude peptide was performed with a  
886 preparative reverse phase high performance liquid chromatography (RP-HPLC) system  
887 (Waters) equipped with a reverse phase C18 column (Zorbax, 300 SB-C18, 21.2 × 250  
888 mm) and using a linear gradient with a binary buffer system of H<sub>2</sub>O:CH<sub>3</sub>CN:TFA (A:  
889 95:5:0.1; B: 5:95:0.1) (flow rate 20 mL/min). The collected fractions were characterized by  
890 LC-MS. The purity (≥95%) of the fractions was determined at 214 nm on RP-UPLC. The  
891 final lyophilized products were used in further experiments.

892

### 893 **Size exclusion chromatography**

894 Before analytical SEC, stocks in PBS-TECP were mixed to desired concentrations in PBS-  
895 TECP and incubated for 20 min at room temperature before being run on a Superdex 200  
896 increase 10/300 gl column (GE Lifescience 28990944) monitoring the Absorbance at 220  
897 nm, 260 nm and 280 nm. The resulting absorbance trace at 260 (peptides alone) 280 nm  
898 (in complex with PSD-95) was plotted and normalized to the maximal absorbance for each  
899 condition. For peptide and protein containing samples, the data was normalized to the  
900 maximal absorbance of the protein sample in absence of peptide. Data was plotted using  
901 GraphPad Prism 8.3.

902

### 903 **SEC Multi Angle Light Scattering (MALS)**

904 SEC-MALS was done using an Agilent HPLC equipped with a Wyatt MALS setup, where 50  
905 µL of 50 µM PSD-95 incubated with 150 µM of indicated peptide was loaded onto a  
906 Superdex200 Increase 10/300 column equilibrated in 50 mM Tris (pH 7.5), 200 mM NaCl, 1  
907 mM TCEP and both absorbance, refractive index and light scattering data was collected.  
908 Resulting data was analyzed and molecular weight was calculated using the ASTRA®  
909 software package, data was plotted using GraphPad Prism 8.3.

910

### 911 **Small-angle X-ray scattering (SAXS)**

912 Concentration series of FL-PSD95 ranging from 30-210  $\mu\text{M}$  was prepared in buffer  
913 containing 50 mM Tris (pH 8.2), 300 mM NaCl, 5 mM EDTA, 1 mM TCEP. Samples were  
914 measured at the P12 SAXS Beamline, PetraIII, DESY, Hamburg Germany (Blanchet et al.,  
915 2015). Preliminary data reduction including radial averaging and conversion of the data into  
916 absolute scaled scattering intensity,  $I(q)$ , as a function of the scattering vector  $q$ , where  $q =$   
917  $4\pi \sin(\theta)/\lambda$  ( $\theta$  = half scattering angle,  $\lambda$  = wavelength) were done using the standard  
918 procedures at the beamline (Blanchet et al., 2015). Scattering data was merged; buffer  
919 subtracted and binned using WillItRebin with a binning factor of 1.02.  $\rho(r)$  functions were  
920 fitted using Bayesian Indirect Fourier transformations (GenApp.Rocks). Ensemble  
921 optimization method was run using known structural domains of PSD-95 (PDZ1-2, PDB:  
922 3GSL; PDZ3, PDB: 5JXB; SH3-GK, PDB: 1KJW) as structural domains and linkers were  
923 modeled as fully-flexible linkers. EOM (Bernado et al., 2007; Tria et al., 2015) (Ranch) was  
924 used to generate 10.000 structural models with 15 harmonics, and 10% symmetric  
925 structures. EOM (Gajoe) was used to fit the pool (10.000 models). Gajoe was run using  
926 1000 generations in the genetic algorithm with 100 ensembles, a non-fixed ensemble size,  
927 with a maximum of 20 curves pr. ensemble and 100 repetitions. The fit was evaluated on  
928 the basis of their  $\chi^2$  value and their  $D_{max}$  and  $R_g$  distributions.

929

### 930 **Flow Induced dispersion analysis (FIDA)**

931 FIDA was carried out using intrinsic fluorescence, using the standard protocol  
932 recommended by the manufacturer, in short, PSD-95 (12  $\mu\text{M}$ ) in absence or presence of 12  
933  $\mu\text{M}$  or 36  $\mu\text{M}$  peptide was loaded to the FIDA1 instrument, the protein containing solution  
934 was used as injectant and the protein with peptide was used as analyte solution. The

935 diffusion of the complex could then be observed using intrinsic fluorescence, and the  
936 hydrodynamic radius was calculated using the FIDA software 2.0 using a single Gaussian  
937 distribution fit, at 75% and curve smoothing. Resulting hydrodynamic radius was plotted  
938 using GraphPad Prism 8.3.

939

#### 940 **Fluorescence Polarization**

941 Fluorescence Polarization (FP) saturation binding (also described in (Bach et al., 2012;  
942 Madsen et al., 2005)) was carried out in a buffer containing 50 mM Tris (pH 8.0), 300 mM  
943 NaCl, 10 mM EDTA, 1 mM TCEP, using an increasing amount of protein incubated with a  
944 fixed concentration of fluorescently labeled peptides as indicated. Competition FP was done  
945 at a fixed concentration of PSD-95 and a bivalent fluorescent tracer, AB-143 (Bach et al.,  
946 2012), against an increasing concentration of unlabeled peptide. After mixing the 96-well  
947 plate (a black half-area Corning Black non-binding) was incubated 20 min on ice after which  
948 the fluorescence polarization was measured directly on a Omega POLARstar plate reader  
949 using excitation filter at 488 nm and long pass emission filter at 535 nm. The data was  
950 plotted using GraphPad Prism 8.3 and fitted to the either a single exponential binding curve  
951 or a sigmoidal single site binding model for saturation experiments or One site competition  
952 for competition experiments.  $K_i$ 's were automatically calculated using the Cheng-Prusoff  
953 equation. All binding isotherms were repeated at least 3 technical replicates or as indicated  
954 in figure legend.

955

#### 956 **Circular Dichroism (CD)**

957 Before CD measurements samples were diluted into 50 mM NaPi buffer (pH 8.0) to a  
958 suitable concentration, Stg peptides 8  $\mu$ M was used and for NA-1 and AVLX-144 10  $\mu$ M  
959 was used. CD measurements were done using a Jasco J1500 at 25 °C with a quartz cell



960 with a 1 mm path length quartz cuvette. Each spectrum was recorded from 260-190 nm at a  
961 0.1 nm step resolution and a scan speed of 50-100 nm/min, each presented spectrum is the  
962 average of three scans. The resulting mDEG signal was converted into molar ellipticity,  $\theta$   
963 ( $\text{deg} \cdot \text{cm}^2 \cdot \text{dmol}$ ) using the equation  $\theta = (\text{mDEG} \cdot 10^6) / (C \cdot N \cdot L)$ , where mDEG is the  
964 measured signal, C is the protein concentration in  $\mu\text{M}$ , N is the number of residues in the  
965 protein, L is the cuvette path length in mm. The resulting CD spectra were plotted using  
966 GraphPad Prism 8.3.

967

### 968 **SDS-PAGE sedimentation assay**

969 Proteins were all mixed in the desired concentration in PBS-TCEP and equilibrated for 10  
970 min before centrifugation at 20 000 g for 15 min at 25 °C using a temperature-controlled  
971 table top centrifuge. Following centrifugation, the supernatant was collected and the pellet  
972 was re-suspended in an equal amount of PBS-TCEP, usually 50  $\mu\text{L}$ . To ensure proper  
973 suspension of LLPS samples were vortexed before addition of SDS buffer boiling at 95°C  
974 for 5 min. Supernatant and pellet fractions were run on any kD™ Mini-PROTEAN® TGX™  
975 Precast Protein Gels (10 or 15 wells, BioRad 4569036 or 4569033). Gels were imaged  
976 using a Li-COR Odyssey gel scanner and band intensities were analyzed using ImageJ.  
977 Significance was evaluated using one-way ANOVA with Dunnett post-test, one-way  
978 ANOVA with Tukey post-test or a two-way ANOVA with Dunnett post-test.

979

### 980 **Confocal microscopy on LLPS droplets**

981 Confocal microscopy was done using a Zeiss LSM780 using a 63x NA 1.4 plan apochromat  
982 oil objective using Argon 488 nm 25 mW, 543 nm HeNe 1.2 mW and 633 nm HeNe 5mW  
983 lasers using a detection wavelength of 490-538 nm for the 488 channel, 556-627 nm for the  
984 543 channel, 636-758 for the 633 channel. Images were acquired using averaging of 4 line

985 scans and 12-bit. The LLPS droplets were prepared in the desired concentration in PBS-  
986 TCEP at desired pH, mostly pH 7.4 unless stated otherwise, and added to an untreated lab  
987 tec (155411PK, Nunc™, ThermoFischer) and imaged after being allowed to settle for 15  
988 min at 25°C. For samples containing fluorescent protein or peptide the content of  
989 fluorescent protein or peptide was kept at 1-10% of indicated total protein or peptide  
990 concentration. Fluorescence after photo bleaching (FRAP) experiments was done by  
991 bleaching of the 488nm or 647 nm channel, normalizing the fluorescence intensity to ROI  
992 intensity before bleaching to 1 and immediately after bleaching to 0.

993

### 994 **NMR spectroscopy**

995 All NMR spectra were recorded on 600 MHz or 750 MHz Bruker Avance III HD  
996 spectrometers equipped with QCI or TCI cryo-probes at 25 °C in 50 mM Tris pH 8, 200 mM  
997 NaCl, 1 mM TCEP, 10 % D2O and 250 μM DSS. Spectra were processed with NMRPipe  
998 (Delaglio et al., 1995) or qMDD (Kazimierczuk and Orekhov, 2011) if non-uniform sampling  
999 was used for the acquisition and analyzed using CCPNMR analysis (Skinner et al., 2016).  
1000 Amide nitrogen and proton chemical shift assignments were kindly shared by Prof. Mingjie  
1001 Zhang and validated using HNCA and HN(CO)CA experiments on a sample with 300 μM  
1002 <sup>13</sup>C<sup>15</sup>N PSD-95 PDZ1-2. Ligand titrations were followed by <sup>1</sup>H-<sup>15</sup>N-HSQC experiments  
1003 recorded on 100 μM <sup>15</sup>N PSD-95 and ligand concentrations ranging from 500 μM to 4 μM.  
1004 Combined chemical shift perturbations were calculated between the unbound and the  
1005 bound states using:  $\Delta\delta(NH) = \sqrt{\Delta\delta(H)^2 + (0.154 * \Delta\delta(N))^2}$

1006

### 1007 **DATA AVAILABILITY**

1008 All primary data and custom scripts are available upon request from the corresponding  
1009 authors.

1010

1011 **FIGURES**

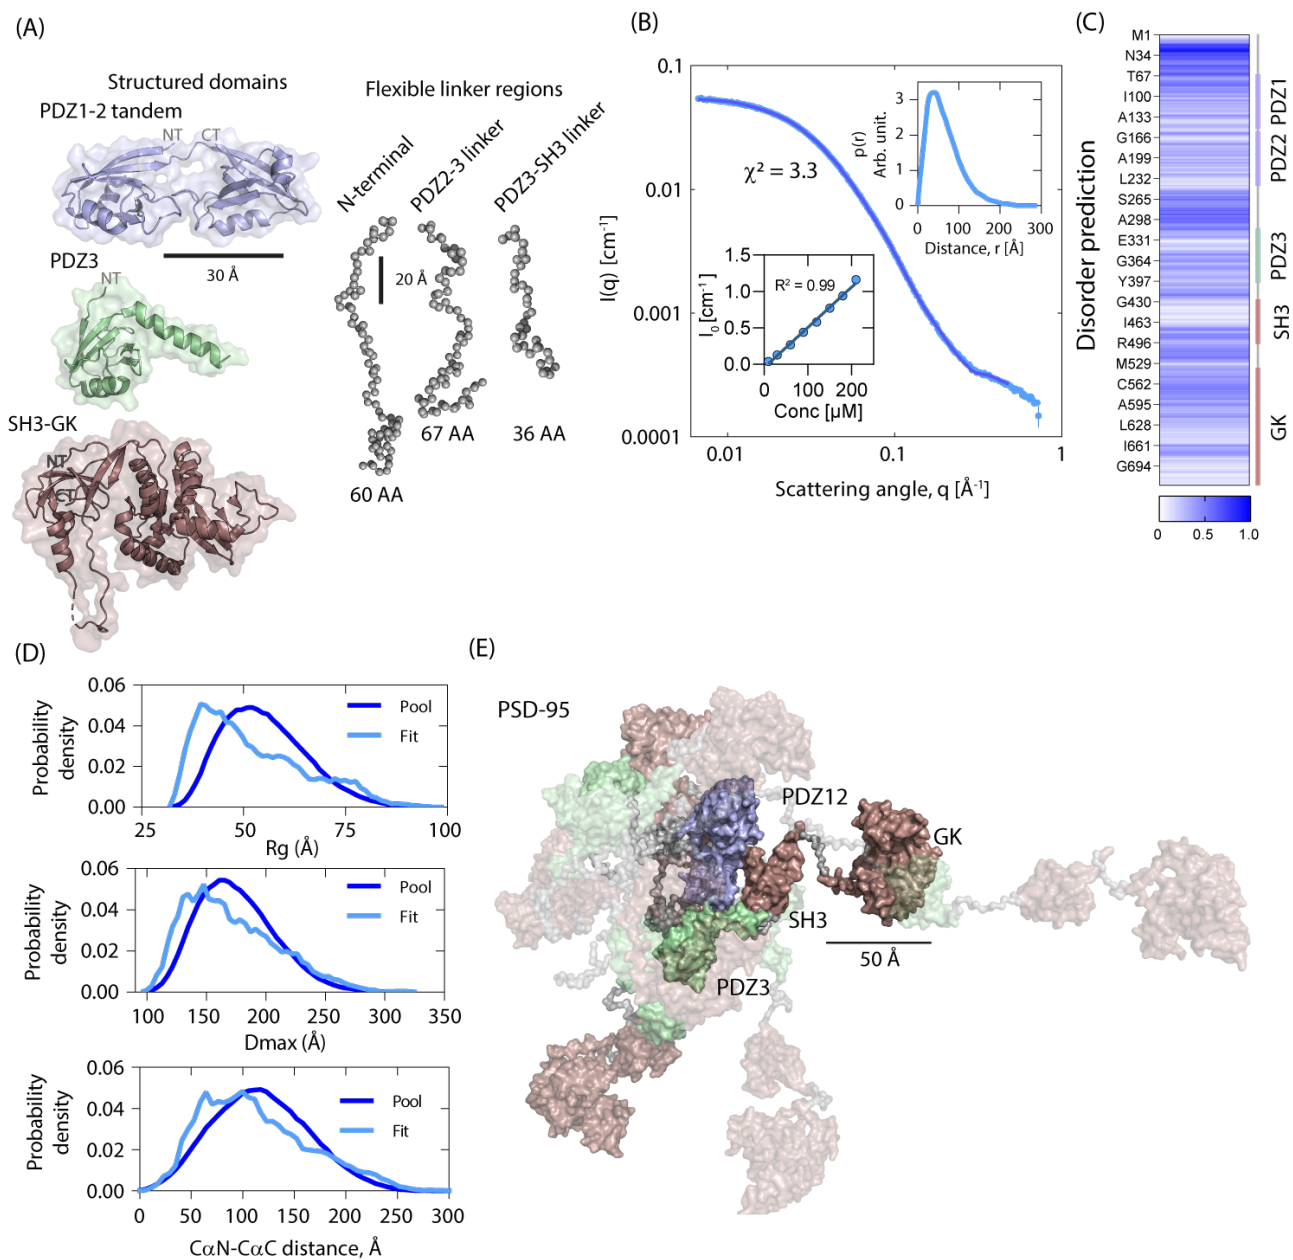

1012

1013 **Figure 1 PSD-95 arranges in a compact state in solution and can undergo pH dependent**  
1014 **LLPS.**

1015 (A) Structured domain and unstructured regions of PSD-95 (PDB: 3GSL, 5JXB, 1KJW).

1016 (B) SAXS data for PSD-95 at 60  $\mu$ M, with  $I(0)$  vs concentration dependency and pair-distance  
1017 distribution,  $\rho(r)$ , (GenApp.Rocks) as inserts. Fit and  $\chi^2$  indicates fit of EOM modeling to the data.

1018 (C) Prediction of PSD-95 disorderedness (IUpred2A) (Dosztanyi, 2018; Dosztanyi et al., 2005;  
1019 Meszaros et al., 2018; Meszaros et al., 2009) with domains indicated to the right.

1020 (D) EOM obtained parameters for ensemble, with  $R_g$  distribution (top panel),  $D_{max}$  distribution  
1021 (middle panel) and  $C_{\alpha N}$ - $C_{\alpha C}$  distance distribution (bottom panel) suggest partial domain flexibility and  
1022 a relatively compact structure of PSD-95 in solution.

1023 (E) Proposed EOM ensemble for PSD-95 with shading according to model ensemble percentage  
1024 (8.1/8.1/8.1/8.1/8.1/17.2/17.1/25.3%). The disordered N-terminals are removed for clarity.

1025

1026

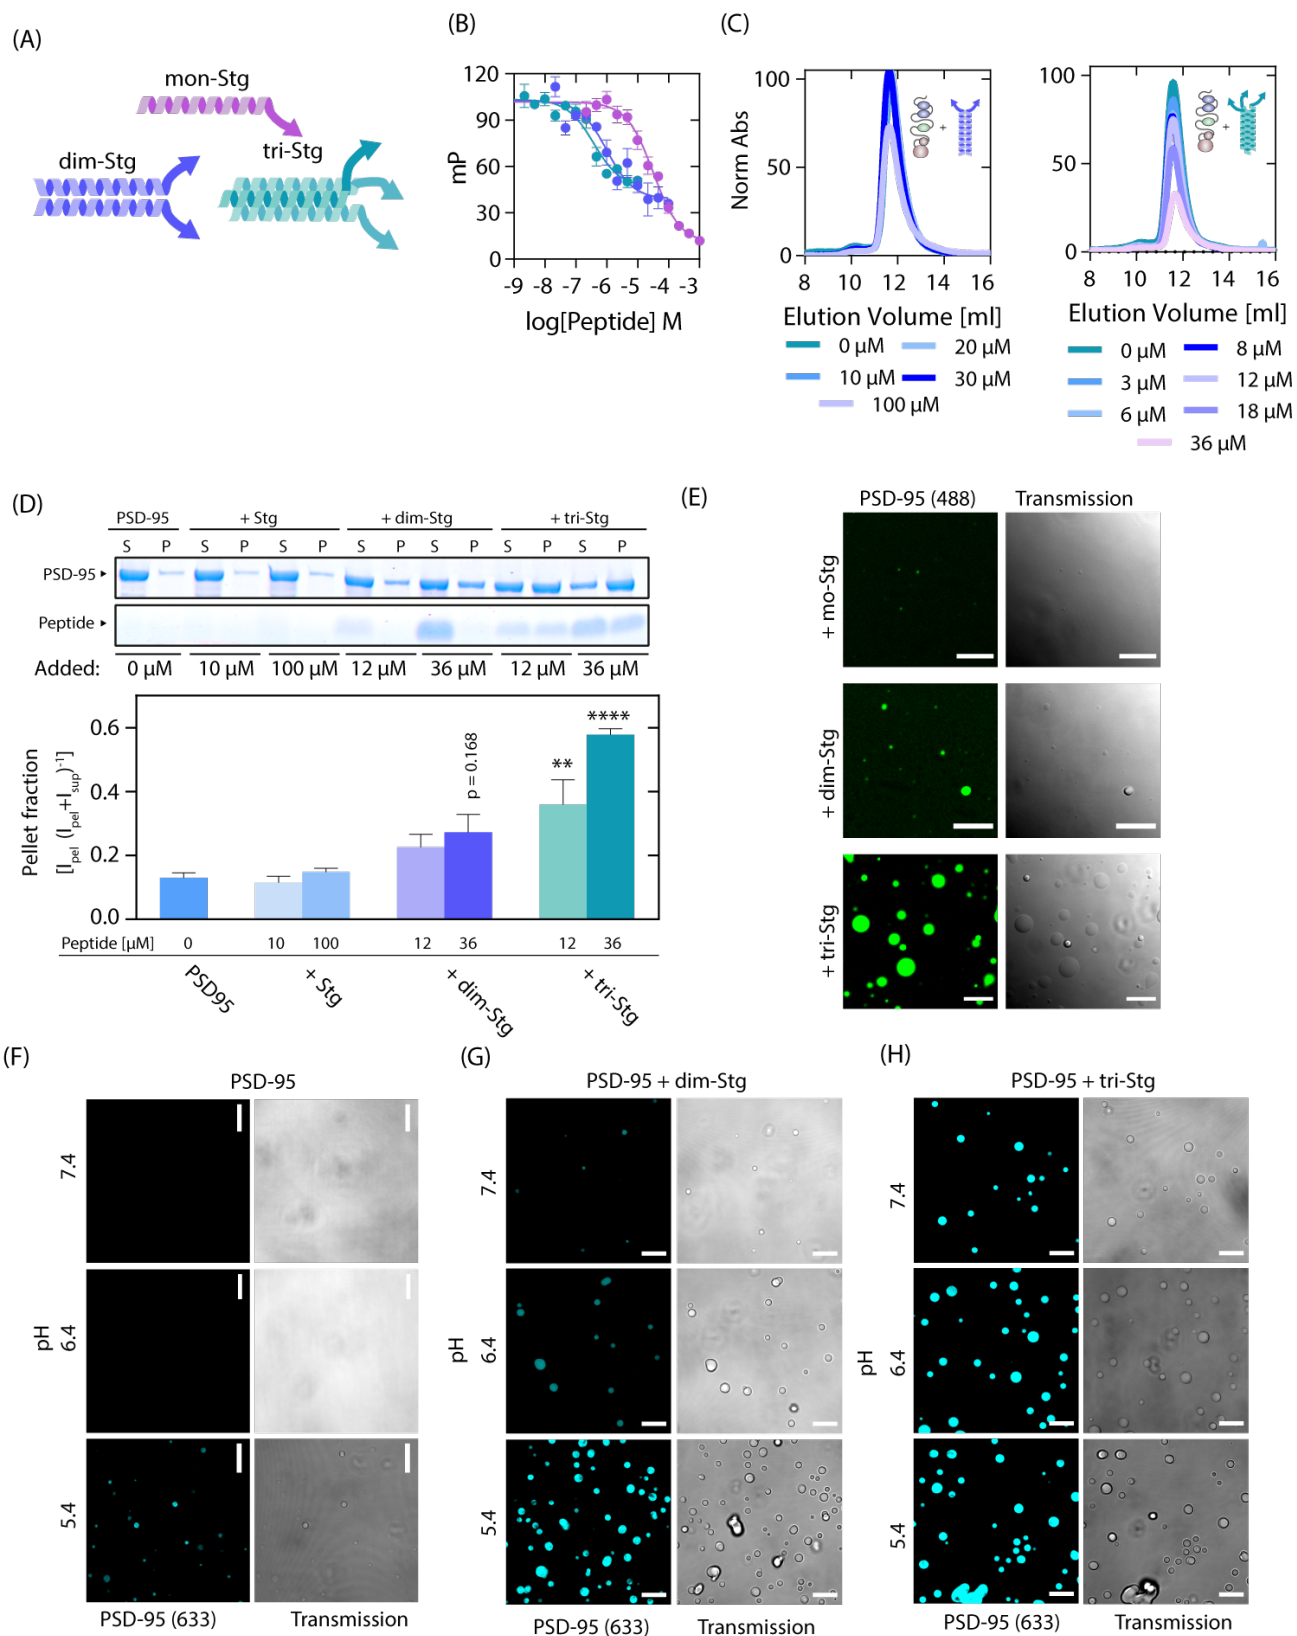

1027

1028

1029 **Figure 2** Multivalent PSD-95-peptide interactions can induce concentration and pH dependent  
1030 LLPS. (A) Illustration of tested monomeric, dimeric or trimeric peptides. (B) Fluorescence  
1031 polarization competition with full length PSD-95 shows 33-fold and 81-fold increased affinities for  
1032 dim-Stg ( $K_i = 237$  nM SEM [195;289] nM,  $n = 6$ ) and tri-Stg ( $K_i = 98$  nM, SEM [81;119] nM,  $n = 6$ )  
1033 over mono-Stg ( $K_i = 7984$  nM, SEM [7146;8910] nM,  $n=6$ ) respectively. (C) Size exclusion  
1034 chromatography elution profile of PSD-95 (10  $\mu$ M) incubated with increasing amounts of dim-Stg or  
1035 tri-Stg. Traces were extracted as absorbance at 280 nm and normalized to the elution of PSD-95 in  
1036 absence of peptide. (D) SDS-PAGE sedimentation assay with full length PSD-95 incubated with Stg  
1037 C11, dim-Stg or tri-Stg indicates formation of liquid-liquid phase separation (LLPS) condensates for  
1038 dim-Stg and tri-Stg, but not Stg-C11. (E) LLPS formation was verified for dim-Stg and tri-Stg by  
1039 confocal microscopy using fluorescently labeled PSD-95 incubated with 36  $\mu$ M of mono-Stg, dim-  
1040 Stg and tri-Stg. Error bars are shown as SEM of (B)  $n=6$  or (D)  $n=3$ . Statistics was done using one-  
1041 way ANOVA with Dunnett post-test. \*,  $p<0.05$ ; \*\*,  $p< 0.01$ ; \*\*\*,  $p<0.001$ ; \*\*\*\*  $p<0.0001$ . (F-H) pH  
1042 dependent LLPS formation was seen for PSD-95, in absence or presence of dim-Stg (G) or tri-Stg  
1043 (H) using confocal microscopy visualized using fluorescently labeled Alexa-6-PSD-95.

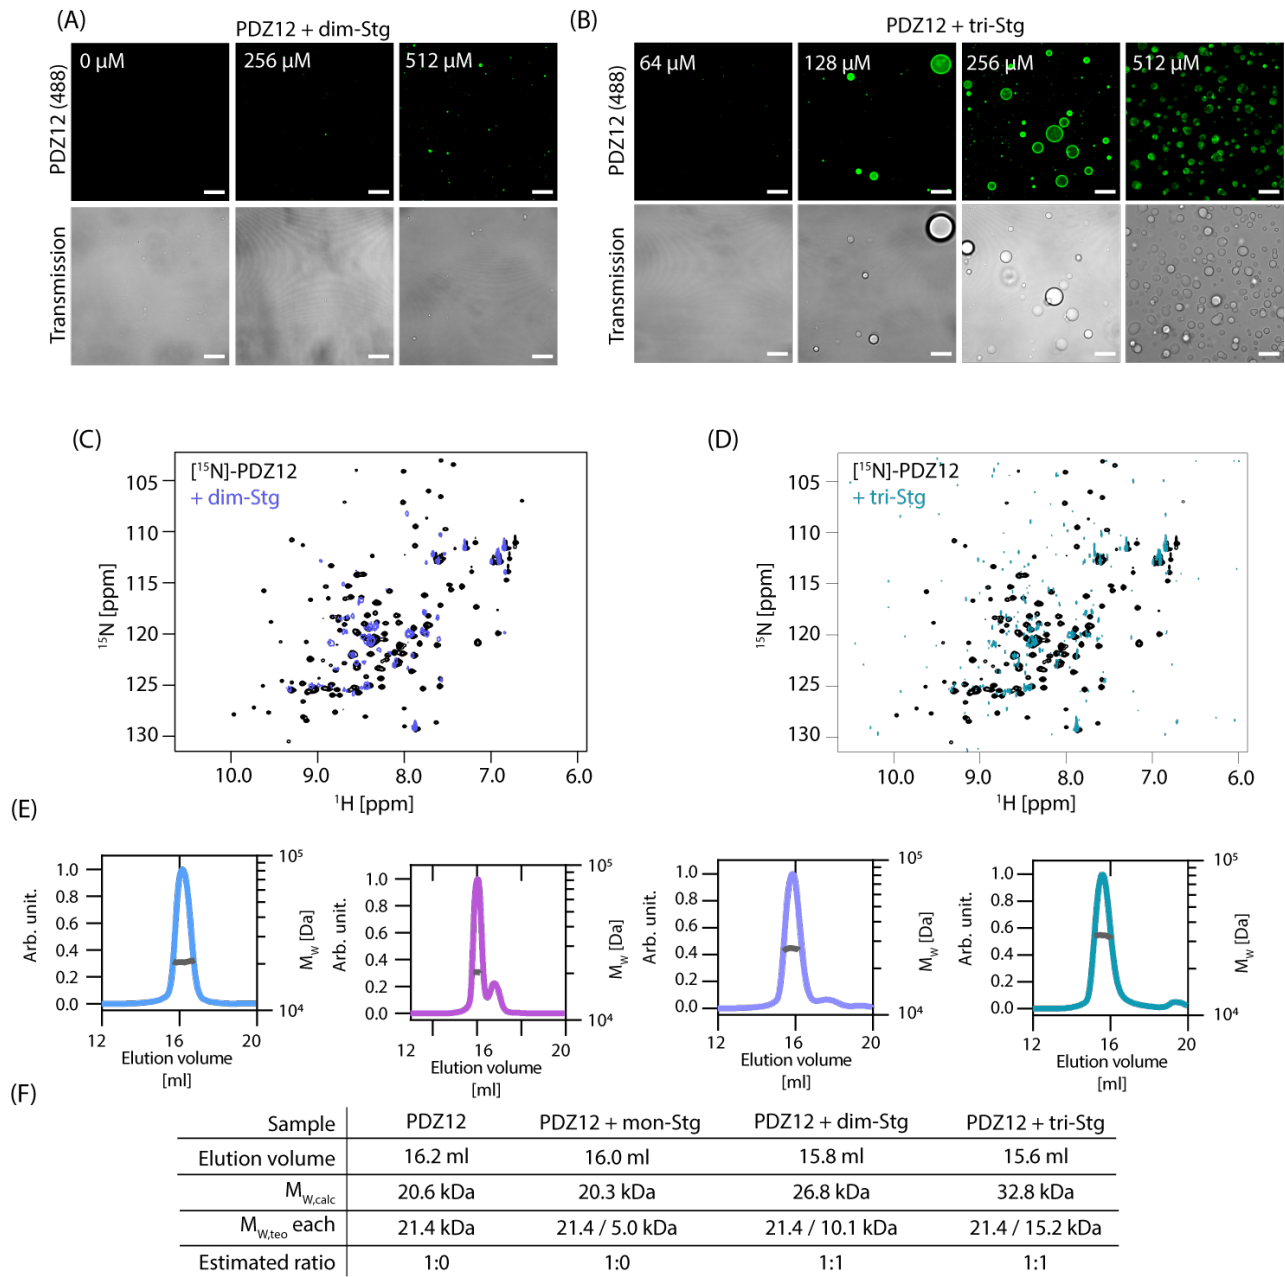

1045 **Figure 3** Simple stoichiometric binding of multivalent interaction partners leads to LLPS formation of  
1046 the PDZ12 tandem from PSD-95. (A) Concentration dependency of LLPS induction for PDZ1-2  
1047 incubated with dim-Stg show only minor LLPS induction. (B) Concentration dependency of LLPS  
1048 induction for PDZ1-2 incubated with tri-Stg show LLPS induction at peptide:protein ratios above 1:1  
1049 and suggests a biphasic droplet formation. (C-D) [<sup>1</sup>H]-[<sup>15</sup>N]-HSQC spectra overlay of 100 μM [<sup>15</sup>N]-  
1050 labelled PSD-95 PDZ12 (black) with 512 μM dim-Stg (C) and 512 μM tri-Stg (D), show severe line-  
1051 broadening likely caused by the dynamic property of the interaction network in the phase separated  
1052 droplets. (E) SEC-MALS elution profiles and molecular weight calculation of 200 μM PDZ1-2 (blue)  
1053 incubated with 600 μM mono-Stg (purple), dim-Stg (blue) or tri-Stg (teal). (F) Data table of fitted  
1054 data from (E), indicating 1:1 complexes between PDZ1-2 dim-Stg or tri-Stg. Fitting was done using  
1055 ASTRA and data plotting was done using GraphPad Prism 8.3.

1056

1057

1058



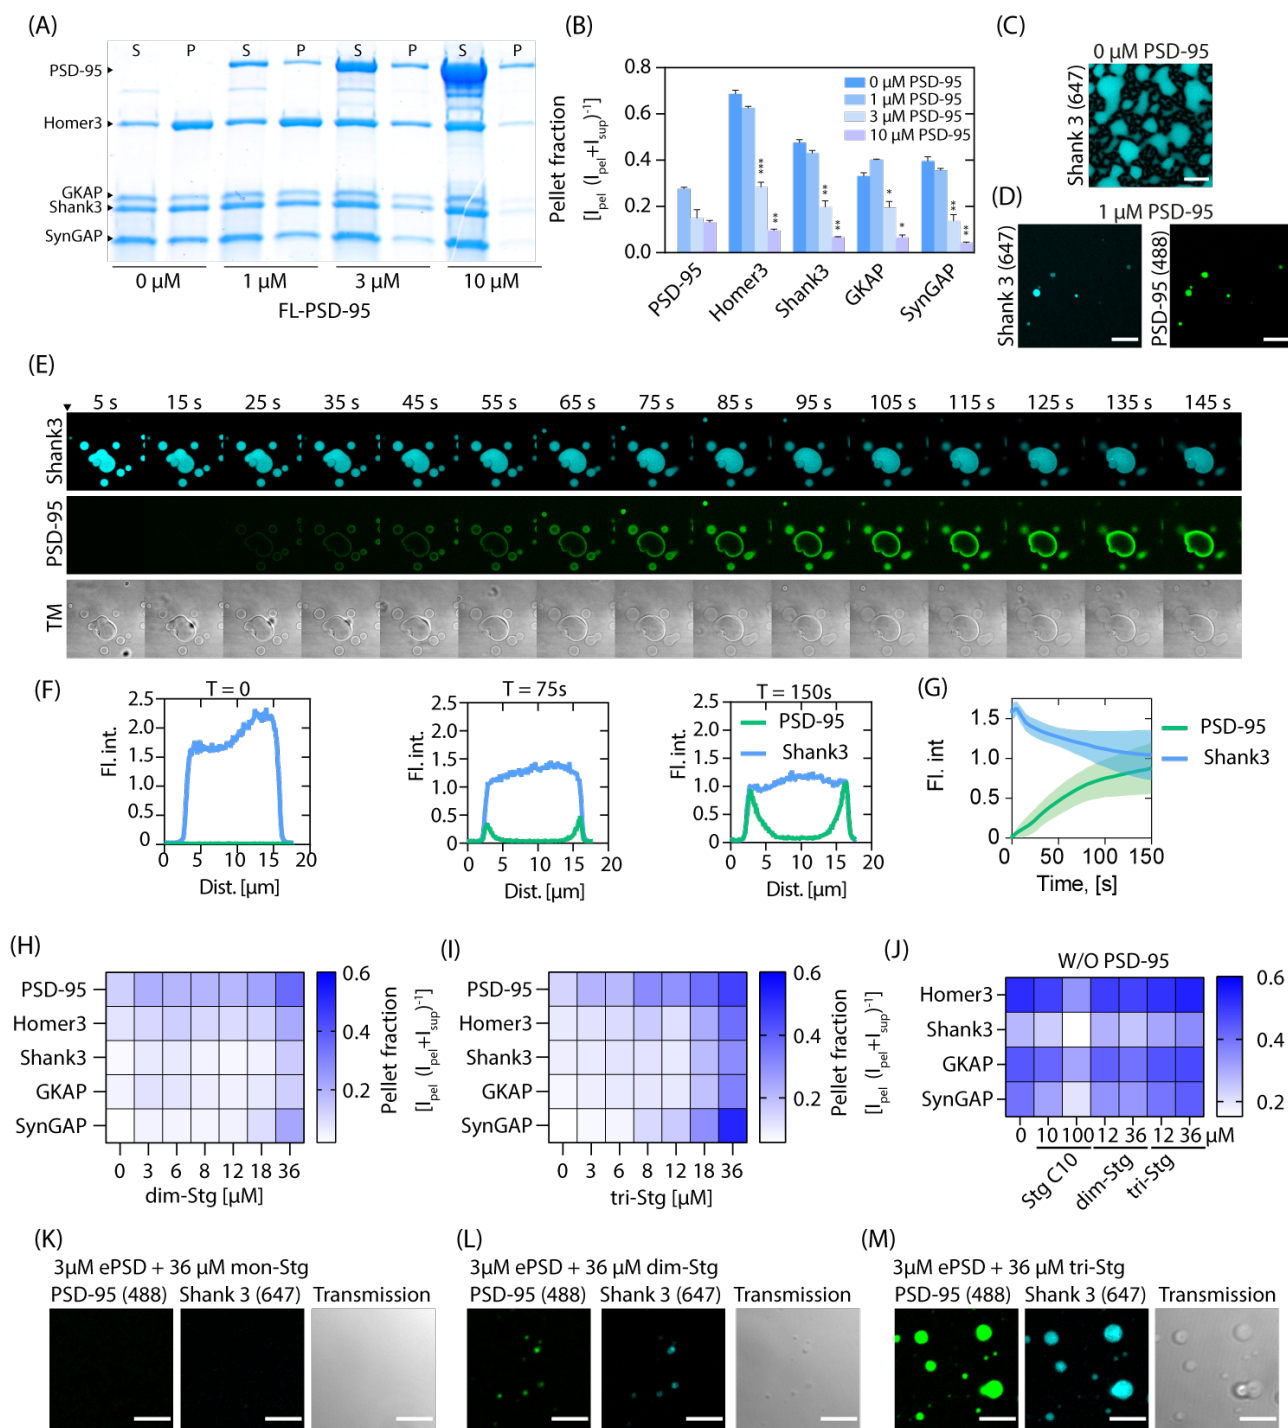

1060 **Figure 4** ePSD condensate can be modulated through multivalent PSD-95 PDZ interactions.

1061 (A) Representative SDS-PAGE gel of sedimentation assay with 3  $\mu$ M Homer3, Shank3, GKAP and

1062 SynGAP (H-S-G-S) incubated with increasing amounts of PSD-95. (B) Quantification of the gels

1063 shown in (A) shows reduction of condensate formation as a function of PSD-95 addition. (C)

1064 Validation of H-S-G-S LLPS condensate formation using confocal microscopy, with fluorescently

1065 labelled Shank3, scalebars 10  $\mu$ m. (D) Confocal microscopy of 5x ePSD condensate with

1066 fluorescently labelled PSD-95 and Shank3, scalebar 10  $\mu$ m. (E) Confocal microscopy time series of

1067 H-S-G-S condensate upon addition of PSD-95 indicates slow absorption of PSD-95 into existing

1068 droplets. (F) Line intensity profile of PSD-95 (Green) and Shank3 (blue) at indicated timepoints,

1069 which show a time dependent reduction in Shank3 signal. (G) Quantification of mean droplet

1070 intensity of Shank3 (blue) and PSD-95 (green) after addition of PSD-95. Error band is the SEM of

1071 three independent chambers. (H-I) Heatmap of SDS-PAGE sedimentation quantification of 5xePSD

1072 (3  $\mu$ M H-S-G-S, 10  $\mu$ M PSD-95) incubated with increasing amounts of dim-Stg (H) or tri-Stg (I).

1073 (J) Heatmap representation of SDS-PAGE sedimentation quantification of H-S-G-S condensate (3

1074  $\mu$ M H-S-G-S) incubated with Stg C10, dim-Stg or tri-Stg. (K-M) confocal microscopy confirmation of

1075 LLPS formation upon addition of dim-Stg and tri-Stg (36  $\mu$ M) to ePSD (3  $\mu$ M). Error bars are shown

1076 as SEM of n=3, scalebars 5  $\mu$ m

1077

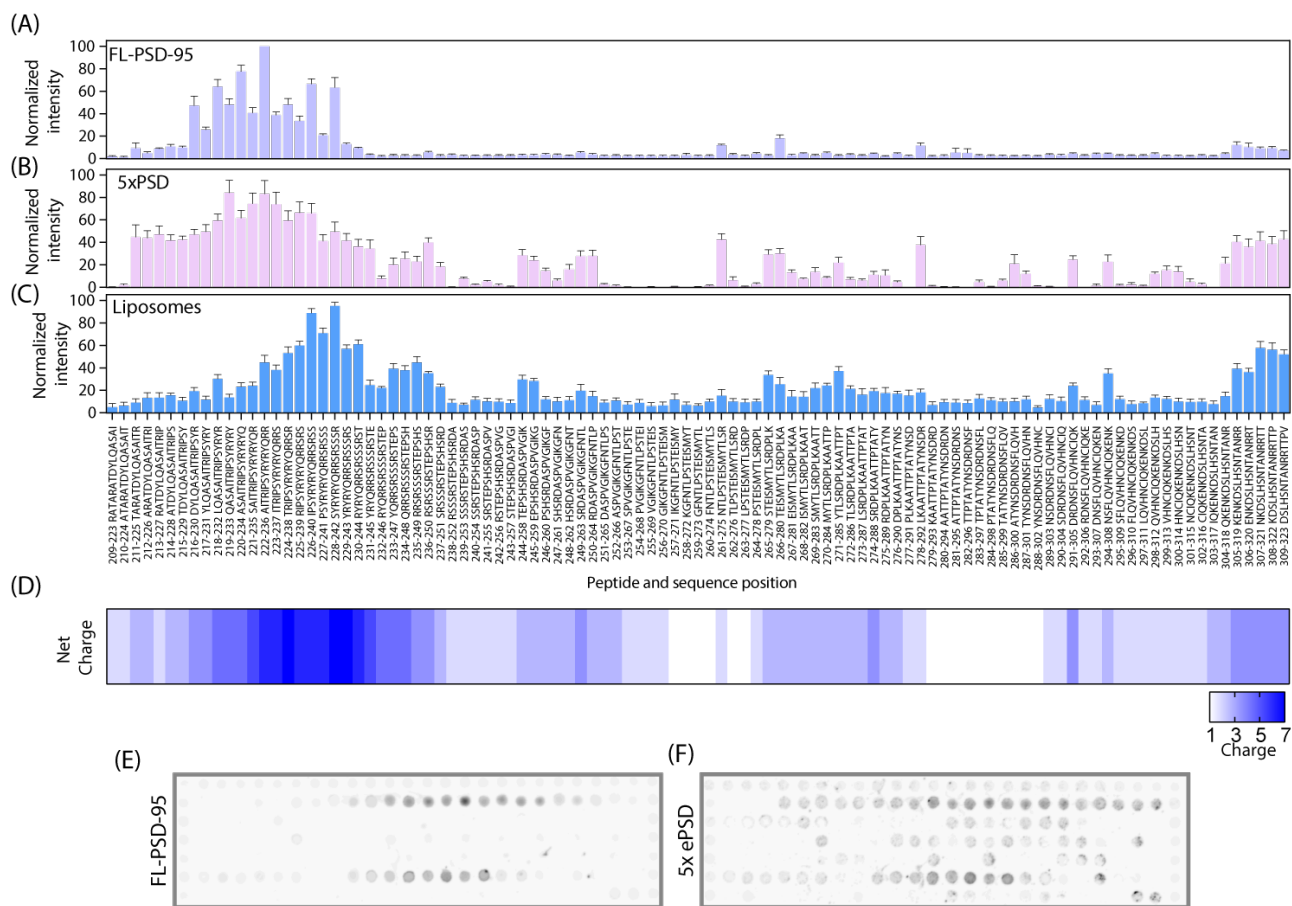

1078

1079

1080

1081 **Figure 5** PSD-95 and ePSD condensate relies on a binding site outside the PDZ motif.  
1082 (A-C) Quantification of CelluSPOT arrays of Stg C-terminal peptides (16-mers) when incubated with  
1083 PSD-95 (A), ePSD (B) or vesicles (C). Primary sequence of peptides is indicated below each bar.  
1084 Error bars are shown as SEM of n=8 for PSD-95 binding, n = 6 for ePSD and n = 8 for vesicles. (D)  
1085 Heatmap of peptide net charge. (E-F) Representative celluSPOT array membranes of Stg C-  
1086 terminal as 16-mer peptides, with a single residue frame shift per peptide, when incubated with  
1087 PSD-95 (1  $\mu$ M, (E)) or ePSD (3  $\mu$ M H-S-G-S and 1  $\mu$ M PSD-95, (F)).  
1088

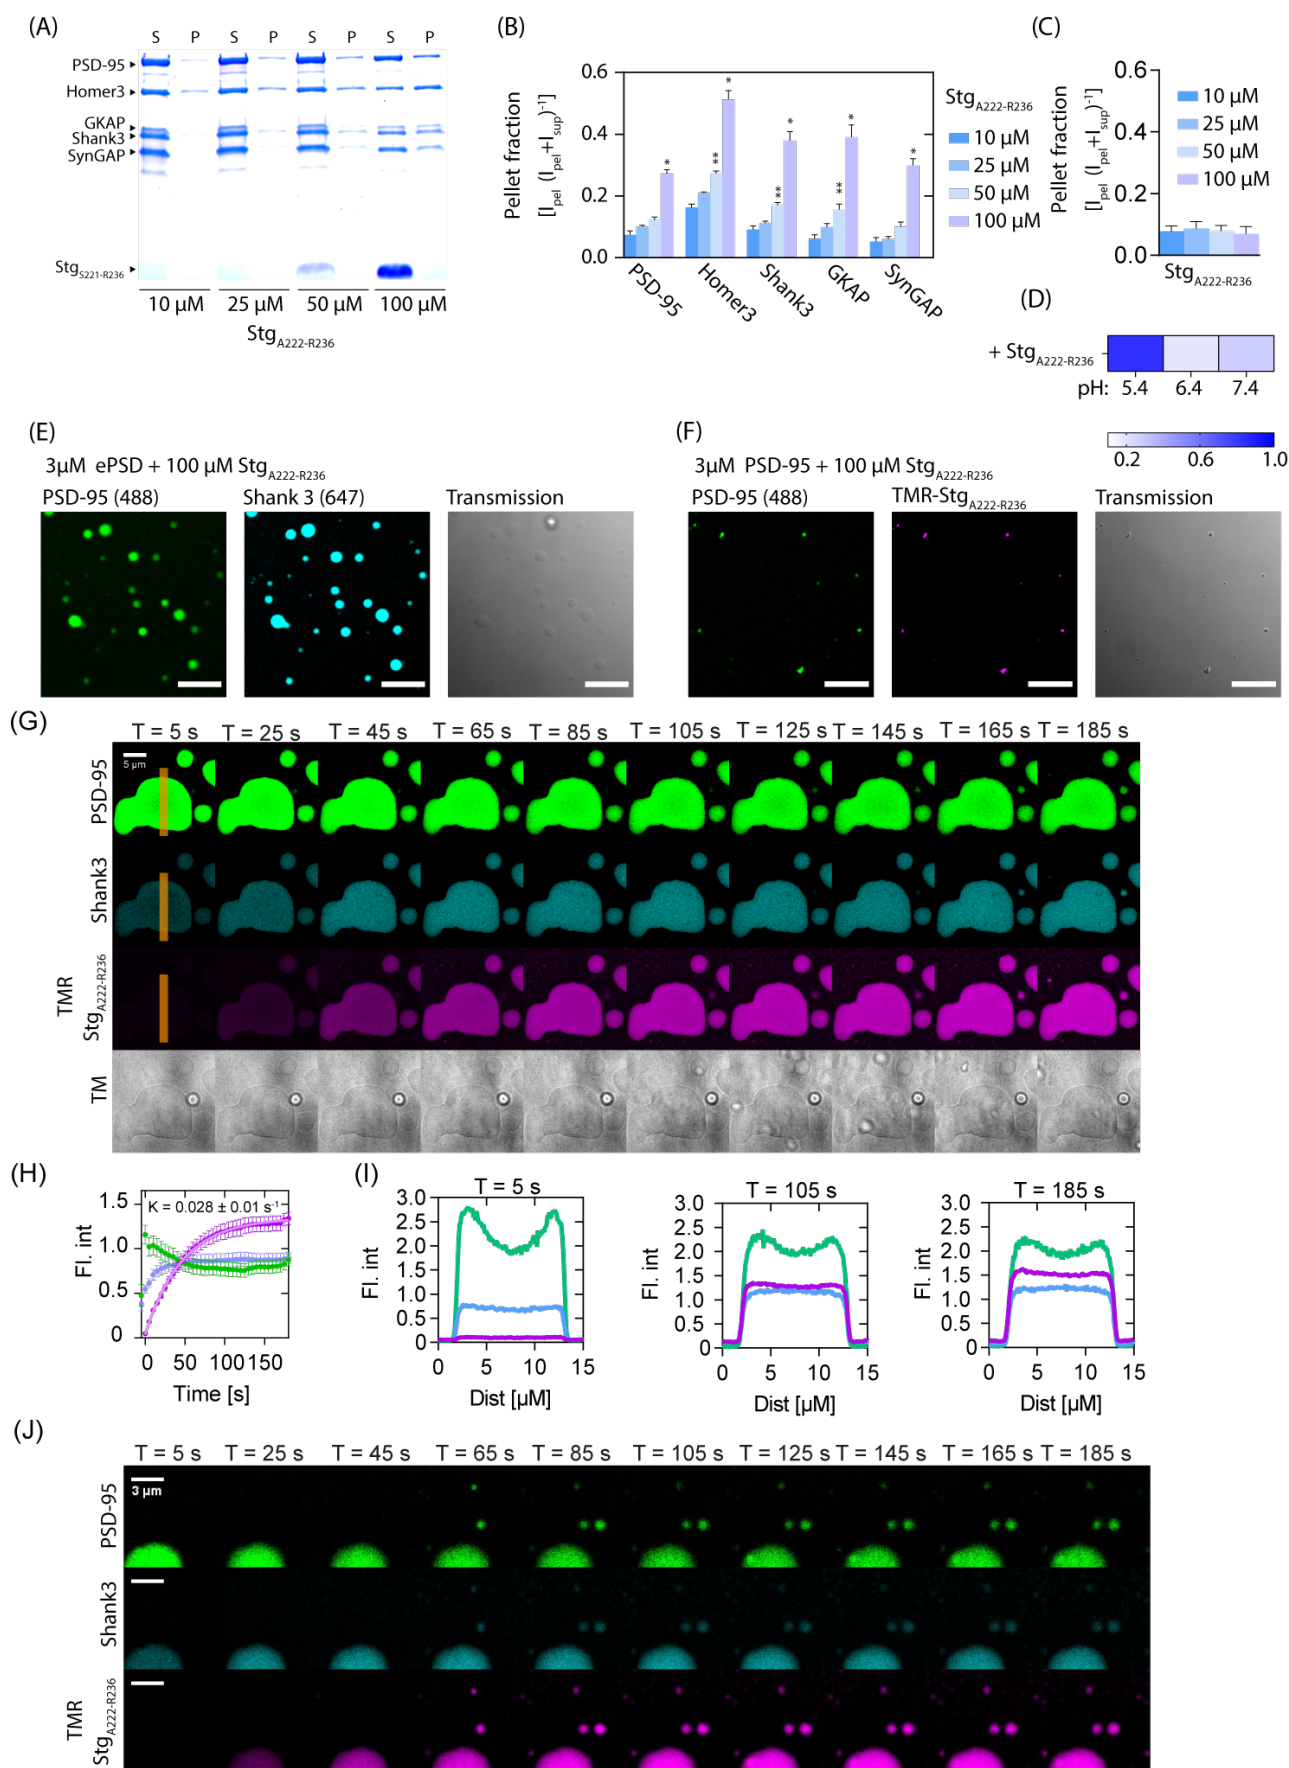

1089

1090

1091 **Figure 6** Stg<sub>A222-R236</sub> is sufficient to induce LLPS. (A-B) SDS-PAGE sedimentation assay with ePSD  
1092 (3  $\mu$ M) incubated with increasing amounts of Stg<sub>A222-R236</sub>, show increasing LLPS.  
1093 (A) SDS-PAGE sedimentation assay with 5xePSD (3  $\mu$ M) incubated with increasing amounts of  
1094 Stg<sub>A222-R236</sub>. (B) Quantification of the gels shown in (A) shows increased tendency for LLPS  
1095 formation with increasing concentrations of Stg<sub>A222-R236</sub>. (C) Quantification of SDS-PAGE  
1096 sedimentation assay with PSD-95 (10  $\mu$ M) incubated with increasing amounts of Stg<sub>A222-R236</sub>. (D) pH  
1097 titration of PSD-95 in presence of Stg<sub>A222-R236</sub> shows increased LLPS formation at lower pH. (E-F)  
1098 Images validating that Stg<sub>A222-R236</sub> can induce LLPS for the ePSD (D) but not for PSD-95 (E) alone.  
1099 (G) Time series of H-S-G-S condensate first incubated with PSD-95 and subsequent addition of  
1100 TMR labelled Stg<sub>A222-R236</sub>, shows uptake into existing droplets. (H) Quantification of mean droplet  
1101 fluorescence intensity shows rapid uptake of TMR Stg<sub>A222-R236</sub>. Error bars are shown as SEM of 17  
1102 droplets, fitting was done using GraphPad Prism using a single exponential association fit. (I) Line  
1103 scans of droplet intensity for PSD-95 (green), Shank (blue), and Stg<sub>A222-R236</sub> (purple). (J) Time series  
1104 of H-S-G-S condensate first incubated with PSD-95 and subsequent addition of TMR labeled  
1105 Stg<sub>A222-R236</sub>, shows formation of new droplets.  
1106

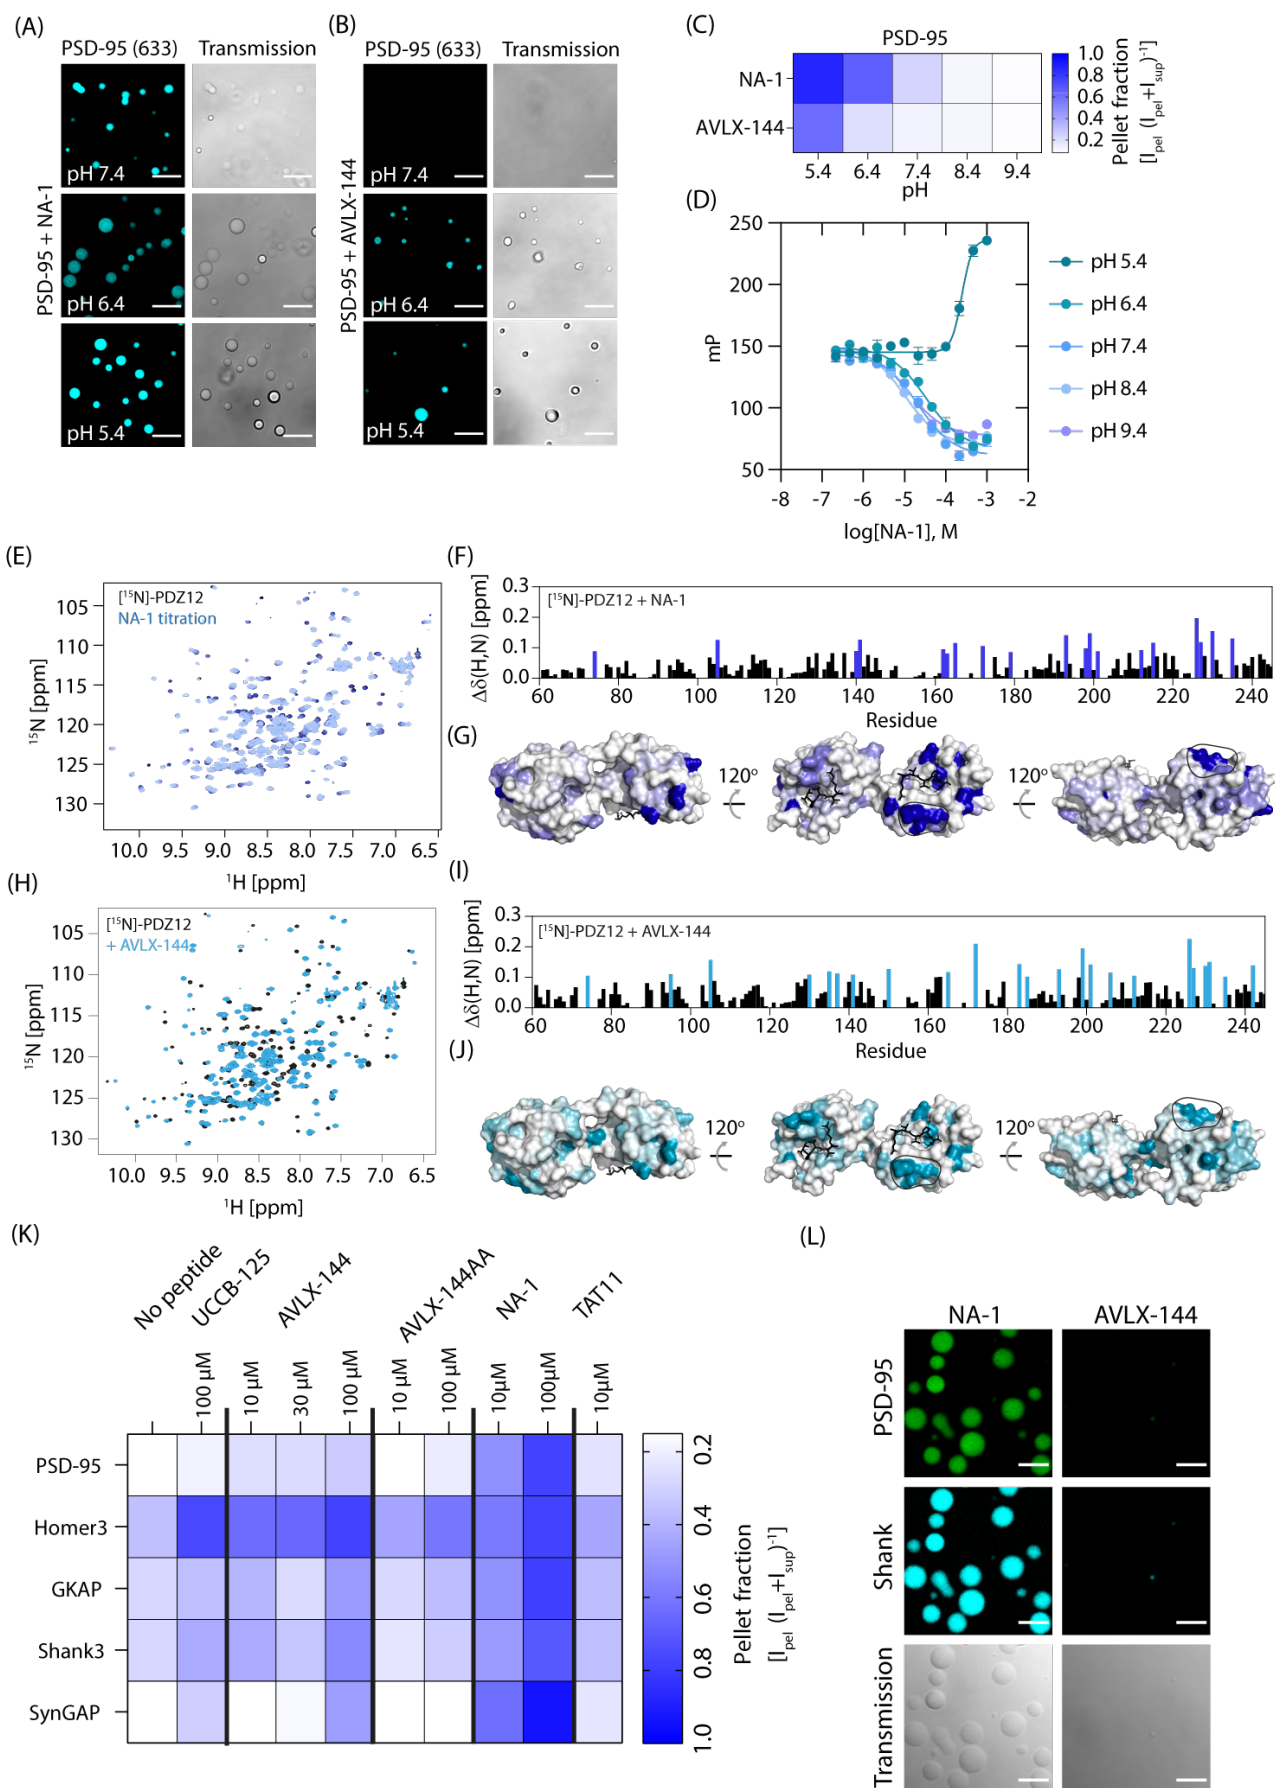

1108 **Figure 7** Pharmacological inhibitors of PSD-95 affect LLPS formation for PSD-95 and ePSD.  
1109 (A-B) Confocal microscopy shows that NA-1 (A) and AVLX-144 (B) and induces LLPS once  
1110 complex with PSD-95 at indicated pH values. (C) Heat map representation of SDS-PAGE  
1111 sedimentation quantification of NA-1 and AVLX-144 pH dependent LLPS induction. (D) Competitive  
1112 FP at different pH suggests drastic changes in the complex size at low pH, as indicated by the  
1113 upward sigmoidal curve, compared to the downward sigmoidal curves for higher pH values.  
1114 (E) [<sup>1</sup>H]-[<sup>15</sup>N]-HSQC spectra overlay of 100 μM PDZ1-2 titrated with NA-1 peptide concentrations  
1115 ranging from 4 μM to 500 μM. (F) Chemical shift perturbation on PDZ1-2 (PDB: 3GSL) upon  
1116 addition of NA-1 show wide spread perturbations in the PDZ1-2 tandem. Blue bars indicates  
1117 perturbations larger than the mean  $\Delta\delta(\text{H,N}) + 1 \text{ Std. Dev.}$  (G) Surface representation of PDZ1-2  
1118 with NA-1 induced perturbations larger than the mean  $\Delta\delta(\text{H,N}) + 1 \text{ Std. Dev.}$  Highlighted in blue,  
1119 while remaining  $\Delta\delta(\text{H,N})$  were colored with a gradient from blue to white according to their  $\Delta\delta(\text{H,N})$ .  
1120 The black ligands represent RTTPV, which was docked into the PDZ binding pocket of both PDZ1  
1121 and PDZ2 using alignment to PDB ID 3JXT (Sainlos et al., 2011). (H) [<sup>1</sup>H]-[<sup>15</sup>N]-HSQC spectra  
1122 overlay of free 100 μM PDZ1-2 (black) and with 512 μM AVLX-144 peptide and PDZ1-2 (teal). (I)  
1123 Chemical shift perturbation on PDZ1-2 upon addition of AVLX-144 show widespread perturbations  
1124 in the PDZ1-2 tandem. Teal bars indicates perturbations larger than the mean  $\Delta\delta(\text{H,N}) + 1 \text{ Std.}$   
1125  $\text{Dev.}$  (J) Surface representation of PDZ1-2 (PDB: 3GSL) with AVLX-144 induced perturbations  
1126 larger than the mean  $\Delta\delta(\text{H,N}) + 1 \text{ Std. Dev.}$  Highlighted as teal, while remaining  $\Delta\delta(\text{H,N})$  were  
1127 colored with a gradient from teal to white according to their  $\Delta\delta(\text{H,N})$ . The black ligands represent  
1128 RTTPV, which was docked into the PDZ binding pocket of both PDZ1 and PDZ2 using alignment to  
1129 PDB ID 3JXT. (K) Heatmap representation of SDS-PAGE sedimentation quantification of indicated  
1130 peptides (see Figure S10 gels and quantification). (L) Confocal microscopy shows that NA-1, but  
1131 not AVLX-144, induces LLPS once complexed with the ePSD.  
1132
